1 **Classification:** Biological Sciences, Evolution

2

3 **Title:** Olfactory receptors tuned to volatile mustard oils in drosophilid flies

4

5 **Authors:** \*Teruyuki Matsunaga<sup>1</sup>, \*Carolina E. Reisenman<sup>2</sup>, \*Benjamin Goldman-Huertas<sup>3</sup>,  
6 Philipp Brand<sup>4</sup>, Kevin Miao<sup>1</sup>, Hiromu Suzuki<sup>1</sup>, Santiago R. Ramírez<sup>4</sup>, Noah K. Whiteman<sup>1#</sup>

7 \*Equal contributions

8

9 **Affiliations:**

10 1 Department of Integrative Biology, University of California Berkeley, Berkeley, CA

11 2 Department of Molecular and Cell Biology, University of California Berkeley, Berkeley, CA

12 3 Department of Molecular and Cellular Biology, University of Arizona, Tucson, AZ

13 4 Department of Evolution and Ecology, University of California Davis, Davis, CA

14 #Correspondence to: whiteman@berkeley.edu (N.K.W.)

15

16 **Keywords:**

17 *Scaptomyza flava*, *Drosophila melanogaster*, herbivory, evolution, olfaction, isothiocyanate,  
18 chemoreceptor, olfactory receptor, TrpA1, wasabi, Or67b

19

20

21 **Abstract (248):**

22 Plant toxins are effective defenses because they are aversive to enemies. The same molecules,  
23 however, are co-opted as host-finding cues by specialist herbivores. Although such behavioral  
24 shifts are central to our understanding of herbivorous insect diversification, it is not well  
25 understood how they evolve. We addressed this in *Scaptomyza flava*, a herbivorous drosophilid  
26 fly within a lineage that shifted to feeding on toxic mustard plants (Brassicales) <10 million  
27 years ago. *S flava* lost the ancestral attraction to yeast volatiles and the attendant  
28 chemoreceptors that detect these odors. Here we report that *S. flava*, but not its close microbe-  
29 feeding relatives *Drosophila melanogaster* and *S. pallida*, is attracted to mustard host-plant  
30 odors, including volatile mustard oils (isothiocyanates or ITCs). Our genomic analysis uncovered  
31 three *S. flava* paralogs of an olfactory receptor gene (*Or67b*) that likely experienced positive  
32 selection. We then tested whether these chemoreceptors could underlie the observed attraction to  
33 volatile ITCs. Our *in vivo* recordings revealed that two of the *S. flava* Or67b proteins (Or67b1  
34 and Or67b3) – but not the homologous Ors from microbe-feeding relatives – responded  
35 selectively and sensitively to volatile ITCs. These Ors are the only ITC chemoreceptors other  
36 than TRP channel family members (*e.g.*, the TrpA1 ‘wasabi’ receptor) known from animals.  
37 Remarkably, *S. flava Or67b3* was sufficient to drive olfactory attraction toward butyl ITC when  
38 expressed in an attractive olfactory circuit. Our study illuminates that ancestrally aversive  
39 chemicals can be co-opted as attractants through gene duplication, leading to the origin of  
40 hedonic valence shifts in herbivorous insects.

41

42

43

44 **Significance Statement (120)**

45 Plant toxins trigger aversive olfactory (volatile-mediated) and gustatory (contact-mediated)  
46 responses in animals. Paradoxically, toxic plants are colonized by specialist insects that co-opt  
47 toxins as host-plant finding cues. The mechanisms underlying these behavioral shifts, from  
48 indifference or repulsion, to attraction, remain unclear. To address this, we used a fly lineage,  
49 *Scaptomyza flava*, that switched from yeast-feeding to feeding on mustard plants less than 10  
50 million years ago. We found that *S. flava* is attracted to mustard-plant odors and volatile mustard  
51 oils (isothiocyanates or ITCs) such as ‘wasabi’, a behavior enabled by the evolution of genes  
52 encoding odorant receptors highly sensitive to ITCs. Our study illuminates how insects colonize  
53 toxic host plants through duplication and ecological repurposing of genes encoding pre-existing  
54 chemoreceptors.

55

56

57

## 58 INTRODUCTION

59 Many plant compounds used in food, agriculture and medicine originally evolved as  
60 toxins that deter and repel enemies (1). Among the most well-known compounds are those  
61 reactive electrophiles that induce the sensation of pain, such as diallyl disulfide and thiosulfinates  
62 produced by Alliaceae plants (*e.g.*, onions and relatives),  $\alpha,\beta$ -unsaturated aldehydes found in  
63 Lauraceae (*e.g.*, cinnamon and olives), and isothiocyanates (ITCs) from mustards and their  
64 relatives in the Brassicales. Paradoxically, herbivores specializing on Brassicales evolved  
65 electrophile diversion or resistance mechanisms and use these plants as a food source and habitat  
66 (2, 3). Mustard specialists can be trapped with ITC baits, indicating that these insects use  
67 “aversive” electrophiles for host finding (4). However, the mechanisms mediating the detection  
68 of species-specific electrophiles and underlying shifts in hedonic valence, are unknown.

69 In animals, the only known and broadly conserved electrophile detecting sensors are  
70 members of the Transient Receptor Potential (TRP) nociceptive channel family (5–7), and the  
71 most studied among them is the Transient Receptor Potential Ankyrin-1 (TrpA1) (8–10).  
72 Reactive electrophiles form covalent adducts with cysteine and lysine residues in TrpA1,  
73 activating this non-selective cation channel and resulting in the perception of pain (9). A  
74 reasonable hypothesis explaining the attraction of specialist mustard-plant insects to host-plant-  
75 derived electrophiles is that the TrpA1 circuit has shifted from an aversive to an attractive one.  
76 However, TrpA1 is a gustatory, non-selective electrophile sensor activated by myriad  
77 electrophiles produced by plants in different orders, including diallyl disulfide, cinnamaldehyde,  
78 and ITCs, rendering this chemoreceptor ineffective in signaling host-plant identity (7).  
79 Alternatively, chemoreceptor proteins (*e.g.*, olfactory receptors -Ors- and/or ionotropic receptors  
80 -Irs-) that commonly mediate responses to volatile compounds in insects (11, 12) are better

81 suited to evoke responses that signal volatile, host-specific electrophiles. Specificity for  
82 ecologically relevant volatiles repeatedly arose through evolution of these olfactory  
83 chemoreceptors (13, 14). In *D. sechellia*, a specialist of the toxic “noni fruit”, Ir75b evolved high  
84 sensitivity to a signature noni volatile through a single amino acid residue substitution (15).  
85 Similarly, in other drosophilid species, Or22a (and Or22b) evolved to be narrowly tuned to host-  
86 plant volatile esters (16, 17), facilitating host-plant specialization.

87         Here, we investigate the evolutionary and functional mechanisms underlying a major  
88 shift in host plant use: olfactory specialization on mustard plants by *S. flava*. *S. flava* is a relative  
89 of *D. melanogaster* nested phylogenetically in the paraphyletic *Drosophila* subgenus and is a  
90 specialist herbivore of ITCs-producing Brassicales plants (18, 19). In behavioral olfactory  
91 assays, we found that *S. flava*, but not its microbe-feeding relatives *S. pallida* or *D.*  
92 *melanogaster*, is attracted to volatile ITCs and odors from Brassicales plants. We scanned the  
93 genome sequence of *S. flava* to identify rapidly evolving chemoreceptors as candidates  
94 underlying this behavioral shift, and identified a lineage-specific expansion of three paralogous  
95 copies of the olfactory receptor gene *Or67b* that exhibited signatures of positive selection in the  
96 *S. flava* lineage. This *Or*, in contrast, is present as a single copy and is under strong evolutionary  
97 constraint in *S. pallida* and *D. melanogaster*. *In vivo* functional testing of *Or67b* copies from  
98 these species shows that two *S. flava* *Or67b* receptors, but not the conserved *Or67b* proteins from  
99 its microbe-feeding relatives, responded sensitively and selectively to volatile ITCs.  
100 Furthermore, *D. melanogaster* flies expressing *S. flava Or67b3* were attracted to butyl ITC in  
101 olfactory assays, indicating that this receptor is sufficient for attraction to volatile ITCs in this  
102 context. We also found that ITCs are not detected through covalent modification of *Or67bs*, as  
103 opposed to TrpA1 (*e.g.* (7)). *Or67b S. flava* proteins selectively shifted their odor-receptive range

104 to ITCs, an entirely new chemical class, from an ancestral olfactome of ketones, alcohols, and  
105 aldehydes. In summary, we discovered an evolutionary mechanism by which specialist  
106 herbivorous insects can shift hedonic valence from aversion to attraction towards host plant-  
107 specific electrophiles. A novel ITC-sensitive olfactory receptor system supplements the  
108 generalist TRP sensory system of a mustard specialist, an adaptation that evolved through gene  
109 duplication and neofunctionalization.

110

## 111 **RESULTS**

### 112 ***S. flava* is attracted to mustard plant odors and volatile ITCs**

113 Because *S. flava* is a Brassicales specialist, we first determined whether this species is attracted  
114 to mustard plant volatiles using a dual-choice olfactory assay (based on (20)). We found that  
115 both adult male and female *S. flava* are attracted to arugula (*Eruca vesicaria*) leaf odors (two-  
116 tailed Binomial tests corrected for multiple testing using false discover rate (FDR),  $p < 0.05$ ; Fig.  
117 1). In contrast, *D. melanogaster* was neither attracted nor deterred by arugula odors but instead  
118 was strongly attracted to apple cider vinegar volatiles (FDR,  $p = 0.0001$ ), in agreement with  
119 previous results (*e.g.* (21)). In tests with apple cider vinegar, male *S. flava* preferred the odorless  
120 arm of the maze (FDR,  $p < 0.05$ ) and females showed a similar tendency (FDR,  $p = 0.0541$ ). *S.*  
121 *pallida* exhibited an intermediate behavior, distributing equally between the vinegar-laden and  
122 the odorless arms of the maze. Overall, these results demonstrate that *S. flava*, but not *D.*  
123 *melanogaster* or *S. pallida*, is attracted to mustard plant volatiles, and avoids odor sources that  
124 strongly attract *D. melanogaster*, characterized by the presence of acetic acid and a variety of  
125 ester, carbonyl, and hydroxyl-containing compounds (22, 23).

126 Brassicales plants produce ITCs upon tissue damage, which are highly toxic to non-  
127 adapted insects (24). Yet, volatile ITCs are effective in capturing a variety of distantly related  
128 specialist insects that have evolved mechanisms for coping with or preventing the formation of  
129 ITCs during feeding (4). We investigated whether the sole presence of ITCs can mediate  
130 olfactory attraction in *S. flava*. Adult female *S. flava* were attracted to both butyl ITC and sec-  
131 butyl ITC (Fig. 1). Males, in contrast, were only attracted to butyl ITC, which suggests that at  
132 particular ITCs might be involved in mediating sex-specific behaviors. Interestingly, *S. pallida*  
133 oriented against butyl ITC (FDR, p-value<0.05), which may be a strategy to avoid ITCs as this  
134 species sometimes feed on decomposing – but not intact – mustard plant leaves. In contrast, *D.*  
135 *melanogaster* flies distributed at random between the arms of the maze regardless of the ITC  
136 compound tested (FDR, p>0.5), indicating that ITCs do not elicit olfactory attraction in this  
137 species. In summary, these experiments demonstrate that *S. flava*, but not its microbe-feeding  
138 relatives, is attracted to mustard plant volatiles and ITCs.

139

#### 140 **Phylogenetic analysis identified *Or67b* paralogs as candidates mediating the detection of** 141 **ecologically relevant odorants**

142 To identify potential *S. flava* chemosensory receptors involved in the attraction of  
143 mustard volatiles, we conducted a phylogenetic analysis of the Or protein sequences of *S. flava*  
144 and four other *Drosophila* species to identify *Scaptomyza*-specific losses and gains (Fig. 2A).  
145 The Or topology was largely congruent with previous *Drosophila* Or trees (25) except for some  
146 deeper nodes, which had weak to moderate bootstrap support. In order to identify *Ors* evolving  
147 under positive selection in *S. flava*, we inferred dN/dS, the ratio of nonsynonymous to  
148 synonymous substitution rates, using a foreground/background branch test as implemented in

149 PAML (26). Of 75 *S. flava* branches tested, seven branch models (for paralogs of *Or63a*, *Or67b*  
150 and *Or98a*, and a homolog of *Or67d*) indicated an *S. flava* foreground rate  $>1$ , consistent with  
151 positive selection (Table S1). Of these receptors, homologs of *Or67d* detect the *Drosophila*  
152 pheromone 11-cis-vaccenyl acetate (27) and likely function in intraspecific communication in  
153 *Scaptomyza*, *Or63a* is only expressed in larvae (28), and the *Or98a*-like genes found in  
154 *Scaptomyza* have no *D. melanogaster* homologs and are functionally uncharacterized. In  
155 contrast, *Or67b* is expressed in adults and modulates oviposition behavior (29), making it a good  
156 candidate. In a previous study, branch-site tests were also consistent with episodic positive  
157 selection acting on *Or67b* paralogs from *S. flava* (19). After expanding the representation of  
158 *Or67b* homologs in a phylogenetic analysis, and conducting branch tests in PAML on all  
159 branches in the tree, we found support for elevated dN/dS exclusively in *S. flava* and *D.*  
160 *mojavensis* branches (Fig. 2B; TableS1). Thus, we focused on *Or67b* paralogs for functional  
161 studies.

162

### 163 ***S. flava* Or67b proteins respond specifically to mustard plant volatiles**

164 We wondered whether any of the three *S. flava* Or67b proteins could mediate the odor-  
165 specific attraction of *S. flava* to mustard plant volatiles. First, we confirmed that all three  
166 paralogs are expressed in adult *S. flava* (Fig. S2B). To study the odor-response profile of Or67b  
167 across species, we used a *D. melanogaster* mutant that lacks its endogenous olfactory receptor  
168 (Or22a) in the ab3A olfactory receptor neuron (known as the “empty neuron system” (30, 31)).  
169 We conducted single sensillum recordings from the ab3 sensilla in transgenic *D. melanogaster*  
170 flies expressing each of the *S. flava* (*Sfla*) *Or67b* paralogs, as well as the *Or67b* orthologs from  
171 *S. pallida* (*Spal*) and *D. melanogaster* (*Dmel*) (Fig. 3A). *Or22a* deletion in ab3A was confirmed



172 by the lack of responses in ab3A to ethyl hexanoate, a strong Or22a activator (Fig. S4A). We  
173 found that ab3A neurons expressing any of the three *Sfla Or67b* paralogs responded to all  
174 mustard plant volatiles tested (Fig. 3B; Mann-Whitney U tests adjusted for multiple comparisons  
175 using FDR,  $p < 0.05$  in all cases). In contrast, neurons expressing *Dmel Or67b* responded strongly  
176 to apple cider vinegar (FDR,  $p < 0.05$ ), but not to any of the mustard plant volatiles tested (FDR,  
177  $p > 0.1$ ). Neurons expressing *Spal Or67b* also showed strong responses when stimulated with  
178 apple cider vinegar (FDR,  $p < 0.05$ ), but displayed only modest responses to arugula volatiles  
179 (FDR,  $p < 0.05$ ). Interestingly, stimulation with apple cider vinegar decreased spiking activity of  
180 neurons expressing *Sfla Or67b1* (FDR,  $p < 0.05$ ).

181         Although neurons expressing any of the *Sfla Or67b* paralogs responded to mustard plant  
182 volatiles, they differed in their responsiveness. Stimulation with arugula volatiles, for instance,  
183 elicited stronger responses in neurons expressing *Sfla Or67b1* ( $64 \pm 7.8$  spikes/sec; average  $\pm$   
184 SE) than in neurons expressing *Sfla Or67b2* ( $24 \pm 8.7$  spikes/sec) or *Sfla Or67b3* ( $22.3 \pm 2.3$   
185 spikes/sec) (Fig. 3B; Kruskal Wallis ANOVA,  $p < 0.005$ , followed by post-hoc Tukey tests,  
186  $p < 0.05$ ;  $n=6$  in each group). In contrast, stimulation with horseradish volatiles produced stronger  
187 responses in neurons expressing *Sfla Or67b3* ( $32 \pm 4.4$  spikes/sec) than in *Sfla Or67b1* ( $8.75 \pm$   
188  $1.3$  spikes/sec) or *Sfla Or67b2* ( $12.8 \pm 2.3$  spikes/sec) (Fig. 3B; Kruskal Wallis ANOVA,  
189  $p < 0.005$ , followed by post-hoc Dunn's tests,  $p < 0.05$ ;  $n=6-9$  in each group). Taken together, these  
190 results demonstrate that *Dmel Or67b* and *Spal Or67b* are functionally similar and may represent  
191 the ancestral phenotype, while *Sfla Or67b* paralogs are divergent and tuned to mustard plant  
192 volatiles.

193

194 ***S. flava Or67b* paralogs respond selectively to ITCs and have different molecular receptive**  
195 **ranges**

196       Upon herbivore damage, mustard plants release ITCs and nitriles in addition to green leaf  
197 volatiles (GLVs) (32). To elucidate which odorants mediate activation of *Sfla Or67b* proteins, we  
198 tested a panel of 44 odorants which include ITCs, nitriles, GLVs, *Dmel Or67b* activators bearing  
199 various functional groups (33), and four ecologically relevant odorants which do not fall within  
200 these categories. Because many compounds were tested, for statistical comparisons we selected  
201 the odorants that produced the strongest average response across all Ors within each of the six  
202 chemical categories tested (those odorants were butyl ITC, mandelonitrile, cis-3-hexenyl  
203 butyrate, trans-2-pentenal, and geranyl acetate (Fig. 3A and C). Neurons expressing any of the  
204 three *S. flava* paralogs responded to stimulation with butyl ITC (FDR,  $p < 0.05$ ), but not to  
205 stimulation with acetophenone (FDR,  $p > 0.1$ ). Conversely, acetophenone evoked the strongest  
206 excitatory responses from neurons expressing *Dmel Or67b* and *Spal Or67b* (respectively  $175.7 \pm$   
207  $17.6$  and  $78 \pm 15.2$  spikes/second; average  $\pm$  SE), while butyl ITC evoked no responses from  
208 neurons expressing *Dmel Or67b* (FDR,  $p > 0.5$ ), and only produced a slight increase in spiking  
209 activity ( $15 \pm 4.2$  spikes/second; average  $\pm$  SE; FDR,  $p < 0.05$ ) from neurons expressing *Spal*  
210 *Or67b*.

211

212 ***S. flava Or67b1* and *Or67b3* differ in their odor selectivity**

213       Although all *S. flava* paralogs are narrowly tuned to ITCs, they differ in their degree of  
214 selectivity and sensitivity. Butyl ITC evoked strong responses in neurons expressing *Sfla Or67b1*  
215 and *Or67b3* ( $196.3 \pm 15.2$  and  $170.6 \pm 11.2$  spikes/second; average  $\pm$  SE) that were not different  
216 from each other (Kruskal-Wallis ANOVA followed by Dunn's tests;  $p > 0.05$ ), while stimulation

217 with this odorant produced only a modest response from neurons expressing *Sfla Or67b2* ( $26.7 \pm$   
218  $2.8$  spikes/second; Dunn's tests, in both cases  $p < 0.05$ ). None of the 44 odorants tested evoked  
219 strong responses from neurons expressing *Sfla Or67b2*, but it is possible that other compounds  
220 not tested in this study, and in particular mustard plant volatiles (Fig. 3C), activate this receptor.

221 Next, because ITCs are highly diverse in structure (34), we hypothesized that a particular  
222 subset of ITCs differentially activate *Sfla Or67b1* and *Sfla Or67b3*. In order to test this, we  
223 stimulated neurons expressing *Sfla Or67b1* and *Or67b3* with various concentrations of six ITCs  
224 (3-methyl-thio-propyl ITC, butyl ITC, isobutyl ITC, sec-butyl ITC, benzyl ITC, and phenethyl  
225 ITC) that evoked very strong responses ( $>123$  spikes/second) from neurons expressing *Or67b3*  
226 at 1:100 vol/vol (Fig. S4). At that concentration, only half of these odorants (3-methyl-thio-  
227 propyl ITC, butyl ITC, isobutyl ITC, and benzyl ITC) produced moderate to strong responses  
228 (41-147 spikes/second, depending on the odorant) from neurons expressing *Sfla Or67b1*. At  
229 1:1,000 vol/vol, the responses of *Sfla Or67b3* to stimulation with phenethyl ITC, sec-butyl ITC  
230 and butyl ITC were different from those of *Sfla Or67b1* (Mann-Whitney U tests adjusted for  
231 multiple comparisons using FDR,  $p < 0.05$  in all cases). Thus, although both *Sfla Or67b1* and  
232 *Or67b3* are highly selective and sensitive to ITCs, they have distinct odorant receptive ranges:  
233 *Sfla Or67b3* is broadly tuned and strongly responds to all ITCs tested, while *Sfla Or67b1* has a  
234 narrower receptive range and responds strongly only to a smaller subset of ITCs.

235

### 236 **Or67b response relatedness, specificities, and functional evolution**

237 We next compared the responses of all the Or67b proteins to all 44 odorants tested in a  
238 multi-dimensional space using principal component analysis (Fig. 4A). Each dot in Figure 4A  
239 shows the vectors quantifying the control-subtracted odor responses of each Or67b copy plotted

240 along the dimensions of the first three principal components, which captured 63.1%, 26.0%, and  
241 9.0 % of the variance of the original high-dimensional data set. This analysis shows that: 1) most  
242 of the ITCs cluster separately from the other odorants tested, contributing to most of the variance  
243 (PC1) of the data set; 2) some *Dmel* activators and GLVs such as acetophenone and cis-3-  
244 hexenyl-butyrate also produced distinct responses, contributing largely to the variance of PC2;  
245 and 3) ITCs that activate *Sfla* Or67b1, such as sec-butyl ITC (but not butyl ITC) contribute to the  
246 variance of PC3. We also constructed tuning curves for each Or67b protein (Fig. 4B). The  
247 strongest responses (center of the distribution) from *Dmel* Or67b and *Spal* Or67b were evoked  
248 by *Dmel* activators and GLVs, while the strongest responses from all *Sfla* Or67b paralogs were  
249 evoked by ITCs. *Sfla* Or67b1 is particularly narrowly tuned to a few ITCs, as revealed by the  
250 high kurtosis value of the distribution (Fig. 4B). Then we conducted a neighbor joining cluster  
251 analysis based on the Euclidean distances between the odor-evoked responses from all the Ors.  
252 Among the *S. flava* paralogs, Or67b1 and Or67b3 have the most similar (shorter Euclidean  
253 distance) odorant responses (Fig. 4C).

254

### 255 **Activation of *S. flava* Or67b1 and Or67b3 requires the presence of the ITC functional** 256 **group**

257 The finding that *Sfla* Or67b1 and *Sfla* Or67b3 respond to ITCs suggest that both the  
258 presence of the ITC functional group ( $-N=C=S$ ) and the size of the molecule determine binding  
259 specificity. These two factors are indeed important to evoke responses from TrpA1, a non-  
260 selective electrophile chemoreceptor that relies on ligand-directed covalent modification (10).  
261 We addressed whether this is also the case for *Sfla* Or67b1 and *Sfla* Or67b3, by testing their  
262 responses to eleven electrophiles (non-ITCs) that activate TrpA1 through covalent linkages with

263 sulfhydryl side chains. Interestingly, none of the non-ITC electrophiles activated neurons  
264 expressing *Sfla Or67b1*, and among these, only trans-2-pentenal produced a very small increase  
265 in spike activity ( $4 \pm 1.3$  spikes/second) from neurons expressing *Sfla Or67b3* (Fig. 3C).  
266 Additionally, we found that neurons expressing *Sfla Or67b* can respond to odor pulses that are  
267 seconds apart (Fig. S5). Because recovery from ligand-induced covalent modifications takes at  
268 least several minutes (and often hours) (7), these results suggest that activation of *Sfla Or67b1*  
269 and *Or67b3* by ITCs does not rely on the TrpA1-like covalent modification strategy.

270 We next investigated whether the presence of the ITC functional group ( $-N=C=S$ ) is  
271 necessary for determining the responses of *Sfla Or67b1* and *Sfla Or67b3*. In order to test this, we  
272 compared the responses of these Ors to benzyl ITC (BITC) and benzyl thiocyanate ( $-S\equiv C-N:$   
273 BTC) (Fig. 4B), linkage isomers of the same molecular weight. We found that BITC produced  
274 robust activity in neurons expressing *Sfla Or67b1* or *Sfla Or67b3* (Mann-Whitney U tests, in  
275 both cases  $p < 0.002$ ), while BTC had little or no effect (Fig. 3C and 4B). This differential  
276 activation pattern is likely due to the differences in the functional group because BITC and BTC  
277 are not only isomers, but also have similar volatilities. These findings are consistent with the  
278 hypothesis that *Sfla Or67b1* and *Sfla Or67b3* detect ITCs by interacting with the ITC ( $-N=C=S$ )  
279 functional group selectively.

280

### 281 ***S. flava Or67b3* is sufficient to induce olfactory attraction to ITCs**

282 Because *Sfla Or67b* paralogs, but not the orthologs from *Spal* and *Dmel*, specifically  
283 respond to ITC compounds, we asked whether these receptors can mediate olfactory attraction to  
284 these odor compounds. We focused on *Sfla Or67b3*, because this Or has a broader sensitivity to  
285 ITCs than *Sfla Or67b1* (Fig. 4B). We investigated this by testing the behavioral responses of *D.*

286 *melanogaster* “empty neuron” mutants that expressed *Sfla Or67b3* or *Dmel Or67b* in the ab3A  
287 neuron. As before, we used a dual-choice “Y-shaped” olfactometer offering an odorant stimulus  
288 (butyl ITC 1:100 or 1:1,000 vol/vol) in one of the arms, and the solvent control in the other arm.  
289 We found that at the 1:100 vol/vol concentration of butyl ITC the odor responses of flies  
290 expressing *Sfla Or67b3* or *Dmel Or67b3* were different from the 50% random expectation (two-  
291 tailed Binomial tests,  $p < 0.005$  and  $p < 0.01$  respectively), with flies orienting towards the odor in  
292 ca. 70-71% of tests (Fig. 5). In contrast, at the lowest odor concentration (1:1,000 vol/vol), the  
293 odor responses of flies expressing *Sfla Or67b3* – but not that of those expressing *Dmel Or67b* –  
294 were different from the 50% random expectation (two-tailed Binomial tests,  $p < 0.00005$ ), with  
295 flies choosing the odorous side of the maze in 83% of tests. Moreover, at the lower  
296 concentration, the odor-responses of flies expressing the *S. flava* transgene were different from  
297 those of flies expressing the *Dmel* transgene (Fisher Exact test,  $p < 0.05$ ). None of the three  
298 genetic control *Dmel* lines showed a preference for either side of the maze (Binomial tests,  $p > 0.1$   
299 in all cases), even at the 1:100 vol/vol concentration. These results demonstrate that *Sfla Or67b3*  
300 can confer odor sensitivity to ITCs that persists at low (1:1,000 vol/vol) concentrations in a fly  
301 that is otherwise not attracted to these odor compounds.

302

### 303 **Discussion**

304 Plants have evolved a myriad of toxic compounds to deter enemies which are generally  
305 perceived as noxious by animals (1). In spite of this, the vast majority of herbivorous insect  
306 species are specialized on one or a few host-plant lineages that contain aversive compounds such  
307 as ITCs – the chemicals that give wasabi its characteristic pungent taste (35, 36). Through the  
308 course of evolution, specialist insects co-opted these chemicals as cues for host-finding, feeding,

309 and egg laying (37). Here, we investigated how attraction to these ancestrally aversive chemical  
310 cues evolved, using *S. flava*, a recently-derived herbivorous fly of mustard plants and their  
311 relatives (Brassicales). In behavioral experiments we found that *S. flava*, but neither of its  
312 microbe-feeding close relatives *S. pallida* or *D. melanogaster*, is attracted to mustard-plant  
313 volatiles, including volatile ITCs (Fig. 1). We next searched for changes in chemoreceptor  
314 proteins that could underlie this host plant-specific olfactory attraction. We found a candidate  
315 olfactory receptor gene (*Or67b*), which was triplicated in a recent ancestor of *S. flava*, resulting  
316 in three divergent and paralogous odorant receptor genes (*Sfla Or67b1-b3*; Fig. 2). These *Sfla*  
317 *Or67b* paralogs evolved with rapid rates of amino-acid changing mutations, consistent with  
318 episodic positive selection (Fig. 2B; TableS1). Next, using the “empty neuron” system of *D.*  
319 *melanogaster*, we investigated the odor-response profiles of these receptors. Consistent with our  
320 behavioral results, we found that two of the *Sfla Or67b* paralogs (*Sfla Or67b1* and *Sfla Or67b3*)  
321 specifically respond to stimulation with mustard-plant odors and volatile ITCs (Fig. 3 and Fig  
322 S5). In contrast, *S. pallida* and *D. melanogaster* paralogs responded strongly to stimulation with  
323 apple cider vinegar and a broad range of aldehydes, alcohols and ketones (Fig. 3 and Fig. 4),  
324 consistent with their microbe-feeding habits. We also found that the presence of the ITC  
325 functional group is necessary for activation of *Sfla Or67b* and furthermore, that activation of the  
326 receptor likely does not involve a TrpA1-like covalent modification (Fig. 3, Fig. 4 and Fig. S5  
327 (7)). Remarkably, when *Sfla Or67b3* was expressed in ab3A “empty neuron” system of *D.*  
328 *melanogaster*, adult female flies were attracted to butyl ITC (Fig. 5). This suggests that *Sfla*  
329 *Or67b3* may be sufficient for the behavioral valence shift observed in the evolution of mustard-  
330 feeding *Scaptomyza*, when expressed in novel neural circuit that ancestrally mediates attraction.  
331 Our results reveal the first Ors characterized from any animal that are tuned to mustard oils, and

332 illustrate an evolutionary mechanism by which mustard specialists can evolve attraction towards  
333 otherwise aversive chemical compounds.

334         The gene triplication event that occurred in the *S. flava* lineage raises several interesting  
335 molecular evolutionary questions. Gene duplication plays an important role in evolutionary  
336 innovation (38) and several outcomes have been proposed regarding to how gene duplication  
337 contributes to acquisition of novel gene functions (38, 39): (A) neofunctionalization occurs when  
338 one of the two duplicated genes (paralogs) acquires a new function after accumulating *de novo*  
339 mutations, while the other copy retains its ancestral function; (B) subfunctionalization is largely  
340 considered a degenerative process whereby mutations accumulate in both copies, leading to  
341 partitioning of the ancestral function between the two gene copies; (C) specialization occurs  
342 when subfunctionalization and neofunctionalization evolve simultaneously, yielding gene copies  
343 that are “functionally distinct from each other and from the ancestral gene” (40, 41). The  
344 specialization model is supported by our data, as neither of the two outgroup Or67b proteins  
345 (*Spal* Or67b and *Dmel* Or67b) responded to ITCs (neofunctionalization), coupled with the fact  
346 that *Sfla* Or67b1 has a narrower breadth of tuning to ITCs than *Sfla* Or67b3  
347 (subfunctionalization). Our conceptual model for this evolutionary hypothesis (Fig. 5) is that the  
348 ancestral Or67b (“1”) was broadly tuned to acetophenone, alcohols and ketones, and diverged  
349 into a mustard oil-specific Or67b (“2”) that lost sensitivity to these compounds and gained  
350 responsiveness to ITCs in the *S. flava* lineage. This *Or* triplicated during the course of evolution,  
351 ultimately giving rise to three Ors with different odor selectivity (“3”): (a) *Sfla* Or67b3, which  
352 retained broad sensitivity to ITCs; (b) *Sfla* Or67b1, which become narrowly tuned to a subset of  
353 *Sfla* Or67b3 activators; and (c) *Sfla* Or67b2, which lost sensitivity to a broad range of ITCs (at



354 least all the nine ITC compounds tested here) and likely retained or gained sensitivity to untested  
355 compounds.

356         Across *Drosophila*, orthologous chemoreceptors respond in a species-specific manner to  
357 ecologically relevant ligands. The best-studied of these is the *Or22a* gene, which has been  
358 evolutionarily deleted in *S. flava* but not in *S. pallida* (19). In several drosophilids, *Or22a* is  
359 tuned to different ecologically relevant esters: ethyl-hexanoate in *D. melanogaster* (16), methyl-  
360 hexanoate in *D. sechellia* (42), 3-methyl-2-butenyl acetate in *D. erecta* (17), and isobutyl acetate  
361 in *D. sukuzii* (43). Similarly, *Ir75b* is tuned to butyric acid in *D. melanogaster* and to hexanoic  
362 acid in *D. sechellia* (15). The fact that the chemical classes are still conserved for each  
363 chemoreceptor (i.e. esters in the case of *Or22a* and acids in the case of *Ir75b*), suggests that the  
364 chemical niche space and underlying sensory mechanisms are relatively conserved across  
365 species. In contrast, while *Spal Or67b* and *Dmel Or67b* respond to alcohols, aldehydes and  
366 ketones, *Sfla Or67b1* and *Sfla Or67b3* respond selectively to volatile ITCs, thus acquiring a  
367 previously undescribed sensitivity to an entirely different chemical compound class (Fig. 6b).  
368 We hypothesize that the striking difference between *Or67b*-activating ligands among these  
369 species resulted from the dramatic shift from feeding on microbes to feeding on live mustard  
370 plant tissue that occurred in the evolution of herbivorous *Scaptomyza*.

371         TrpA1, which mediates taste-aversion to ITCs, is one of the most well-studied contact  
372 chemoreceptors (7, 8, 10). However, volatile ITCs are widely used to trap agricultural pests of  
373 Brassicales (4), and in agreement with this, the antennae of some of these insects respond to  
374 volatile ITCs (44). Our study further advances the understanding of how volatile ITCs may be  
375 detected by these insects. Furthermore, we uncovered a potential evolutionary mechanism, gene  
376 duplication followed by neofunctionalization and subfunctionalization, by which ITC-responsive

377 Ors evolved in Brassicales specialists. More generally, our results suggest that major host shifts  
378 and specialization events in herbivorous insects can result from simple genetic changes of large  
379 effect in the peripheral nervous system, similar to the apple maggot fly *Rhagoletis pomonella*  
380 (45). This in turn may explain why such events are so common across herbivorous insect  
381 lineages, resulting in rapid rates of diversification and the most diverse guild of macroscopic life  
382 to have evolved (46, 47).

383

384

### 385 **Material and Methods:**

386 Material and methods are summarized below. For complete details, see Supplemental Methods.

#### 387 **Fly lines**

388 M2-MD refers to a CRISPR/Cas9-mediated deletion of *Or22a/b* and a knock-in of *Gal4*  
389 and *DsRed* by homologous repair. *Gal4* is not functional but *DsRed* is expressed in the eye. The  
390 functional absence of *Or22a* and *Or22b* genes in M2-MD flies was confirmed by  
391 electrophysiological analysis on *Or22a/b* expressing neurons in wild-type flies (Fig. S3). The  
392 four *UAS-Or67b* lines created in this study, the *UAS-Dmel Or67b* line, and the *UAS-dTrpA1*  
393 (stock no. 26264) line was each crossed into the M2-MD line. The progeny were then used for  
394 SSR recordings and behavioral experiments.

395

#### 396 **Behavioral tests of olfactory attraction**

397 The olfactory responses of mated, non-starved *D. melanogaster* (Canton-S or transgenic),  
398 *S. pallida*, and *S. flava* were tested using a dual-choice “Y-shaped” olfactometer based on one  
399 previously published (20). Insects could walk upwind towards the “decision point” (intersection

400 of the short and long arms of the “Y”) and turn towards either the odor-laden or the odorless arm  
401 of the maze. Four insects were released at once (to increase experimental efficacy), but only the  
402 first choice was considered.

403 The odorants (20 µl of 1:100 vol/vol mineral oil solution) used in experiments were butyl  
404 ITC (Sigma-Aldrich, CAS # 592-82-5, USA) and sec-butyl ITC (Sigma-Aldrich, CAS # 15585-  
405 98-5, USA). For tests with transgenic flies, responses were tested at 1:100 vol/vol and 1:1,000  
406 vol/vol of butyl ITC. We also used apple cider vinegar (40 µl, O Organics, USA; 40 µl of  
407 distilled water was as control stimulus in these tests). For tests of host orientation, two-four  
408 leaves from young arugula plants grown in an insect and insecticide/pesticide free chamber or  
409 greenhouse were excised just before tests.

410 For each odor/odorant, species, sex and genotype, the number of tests with insects  
411 orienting towards the odorous arm and the odorless arm of the Y-maze was used to conduct two-  
412 tailed Binomial tests (48). When appropriate, p-values were adjusted for multiple  
413 testing/comparisons using the false discovery rate (FDR) method of Benjamin-Hochberg (49);  
414 results were considered statistically significant if the Benjamini-Hochberg adjusted p-value was  
415 <0.05. For all tests, we verified that the power was >0.8.

416

#### 417 **Molecular phylogeny of drosophilid odorant receptors:**

418 Translations of *Ors* from *D. grimshawi*, *D. mojavensis*, *D. virilis* and *D. melanogaster*  
419 (builds dgri r1.3, dmoj r1.3, dvir r1.07 and dmel r6.28, respectively) were downloaded from  
420 Flybase ([www.flybase.org](http://www.flybase.org), (50)) and *S. flava* sequences were obtained from ref. (19). Three  
421 hundred and nine sequences were aligned in MAFFT v7.017 (51). Models were fitted to the  
422 alignment using IQ-Tree and tested using the AIC criterion (52). A maximum likelihood (ML)

423 phylogeny was generated using the Or protein alignment in RAxML v8.2.10 (53). Orco  
424 sequences were designated as the outgroup.

425

426 **Molecular phylogeny of drosophilid *Or67b* genes:**

427 *Or67b* CDS from *D. grimshawi*, *D. mojavensis*, *D. virilis*, *D. sechellia*, *D. simulans*, *D. erecta*, *D.*  
428 *yakuba*, *D. pseudoobscura*, *D. persimilis*, *D. ananassae*, *D. willistoni* and *D. melanogaster*  
429 (builds dgri r1.3, dmoj r1.3, dvir r1.07, dsec r1.3, dsim r1.4, dere r1.3, dyak r1.3, dpse r3.2, dper  
430 r1.3, dana r1.3, dwil r1.3 and dmel r6.28, respectively) were downloaded from Flybase  
431 ([www.flybase.org](http://www.flybase.org), (50)). The *S. pallida* DNA sequence was obtained through PCR. Sequences  
432 were aligned, models fitted and chosen according to AIC (GTR+I+G) in IQ-Tree (52). Trees  
433 were inferred using RAxML (v8.2.10) with the GTRCATI model and 1000 rapid bootstraps, and  
434 MrBayes (v3.2.6) (54).

435

436 **Analysis of molecular evolution:**

437 CDS of homologs of every *Or* gene in *S. flava* found in the 12 *Drosophila* genome builds were  
438 aligned to *S. flava Or* CDS. Homology was assessed according to inclusion in well supported  
439 clades in the *Or* translation phylogeny above. Sequences were aligned in MAFFT (v7.017) (51).  
440 Phylogenies were generated for every alignment using PhyML (55). If these trees showed >70%  
441 bootstrap support for a topology contrary to the known species topology, or if the *Or* homology  
442 group contained duplicates, these trees were used in PAML analyses instead of the species tree.  
443 Branch models of sequence evolution were fit using PAML 4.9h (26). A foreground/background  
444 branch model was fit for every *S. flava* tip branch and every ancestral branch in a *Scaptomyza*-

445 specific *Or* gene duplication clade, and compared in a likelihood ratio test to a null model with  
446 one dN/dS rate for every unique phylogeny (total: 75 tests). After focusing on *Or67b*, patterns of  
447 molecular evolution among the drosophilid *Or67b* homologs were explored using the expanded  
448 *Or67b* CDS phylogeny above. Foreground/background branch models were fit for every branch  
449 in the *Or67b* phylogeny with identical likely ratio tests performed as above (29 tests total Fig.  
450 2B; Table S1). P-values were adjusted for multiple testing using the FDR method (49).

451

#### 452 **Distance tree based on SSR recordings from neurons expressing *Or67b* transgenes**

453 A matrix of average responses from five *Or67b* transgene receptors to 44 odorant compounds  
454 (1:100 vol/vol concentration) was produced (Table S3). Net responses were obtained by  
455 subtracting the response to mineral oil or dimethyl sulfoxide solvents. A Euclidean distance  
456 matrix was generated using the *dist* function from the R stats package (56). Receptor responses  
457 were clustered by using the neighbor joining (NJ) algorithm on this distance matrix. Support for  
458 clusters was assessed using 1,000 bootstraps of the original response matrix by generating  
459 distance matrices and NJ trees on the pseudo-datasets in ape (v5.3) (57).

460

#### 461 **Single sensillum recordings (SSR)**

462 Adult female flies were fed and then prepared for SSR as previously described (58).  
463 Extracellular activity was recorded by inserting a tungsten electrode into the base of the ab3  
464 sensillum. The following odor sources (all purchased in Berkeley, California, US unless  
465 otherwise mentioned; 20 µl of material loaded on filter paper) were used: apple cider vinegar (O  
466 Organics, USA), grated roots of *Wasabia japonica* (wasabi), organic roots of *Armoracia*  
467 *rusticana* (horseradish), *Brassica rapa* (turnip), *Raphanus sativus* (daikon), and *Beta vulgaris*

468 (beet). *Eruca vesicaria* (arugula) was grown from seeds in the lab, and leaves of 3-8 weeks old  
469 plants were used for odor stimulation. Roots or leaves were grated and homogenized using a  
470 vegetable grater to a volume equivalent to ~500  $\mu$ l. The “net number of spikes” were obtained by  
471 counting the number of spikes during a 1-second window 0.2 seconds after the onset of  
472 stimulation, and subtracting from this number the background spiking activity (number of spikes  
473 during 1-second previous to the onset of odor stimulation). Data were analyzed using Mann-  
474 Whitney Rank sum tests (for comparisons involving two means) and p-values were adjusted for  
475 multiple comparisons using the FDR method, or by Kruskal-Wallis ANOVAs followed by  
476 Dunn’s or Dunnet’s tests (for comparisons involving more than two means).

477

#### 478 **Data Analysis and figure generation:**

479 All images and drawings are originals prepared by the authors. Figures were prepared via a  
480 combination of WinEDR (v3.9.1), R Studio (v1.2.1335), Microsoft Excel (2016), Adobe  
481 Illustrator (2019), Python, and Geneious (10.0.9).

482

#### 483 **Acknowledgments:**

484 We are grateful to Drs. Chauda Sebastian, Dennis Mathew, John Carlson and Bloomington  
485 Drosophila Stock Center (NIH P40OD018537) for sharing *M2-MD*, *UAS-Dmel Or67b*, and *UAS-*  
486 *dTrpA1* (stock no. 26264), and to Drs. Johannes Bischof and Konrad Basler for donation of the  
487 pUASTattB plasmid. C.E.R. thanks Dr. Kristin Scott for support and encouragement. We thank  
488 members of the Whiteman and Scott Laboratories for discussions and comments on the  
489 manuscript. This work was supported by the National Institute of General Medical Sciences of

490 the National Institutes of Health (award number R35GM119816 to N.K.W.) and the National  
491 Science Foundation (award number IOS 1755188 supporting B.G.-H.).

492

493

494

495

496

497

498

499

500

501

502

503

504

505

506

507

508

509

510

511

512

513

514

515

516

517

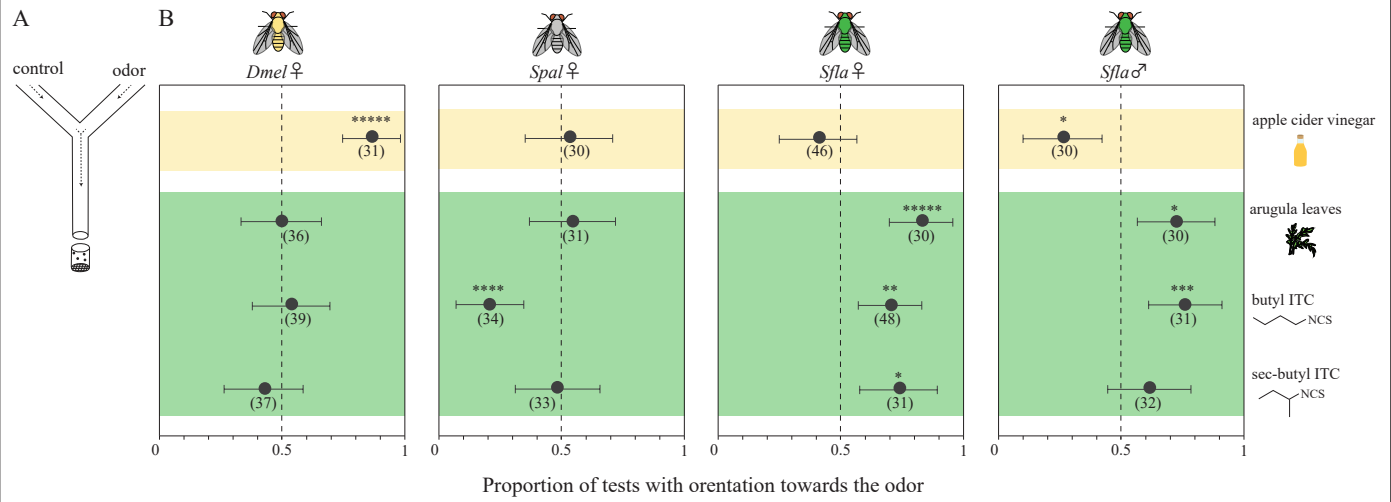





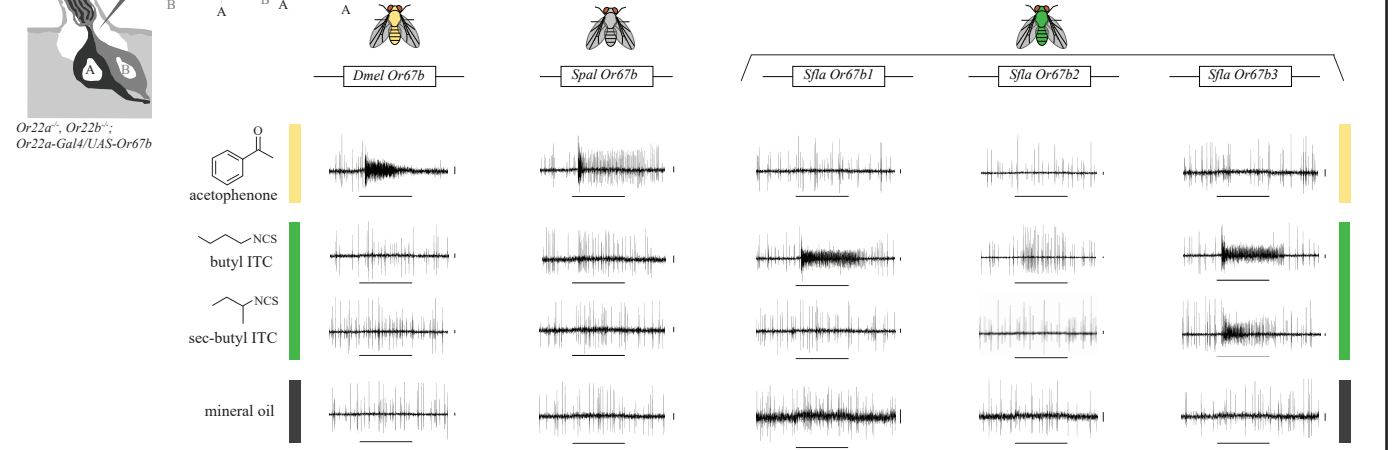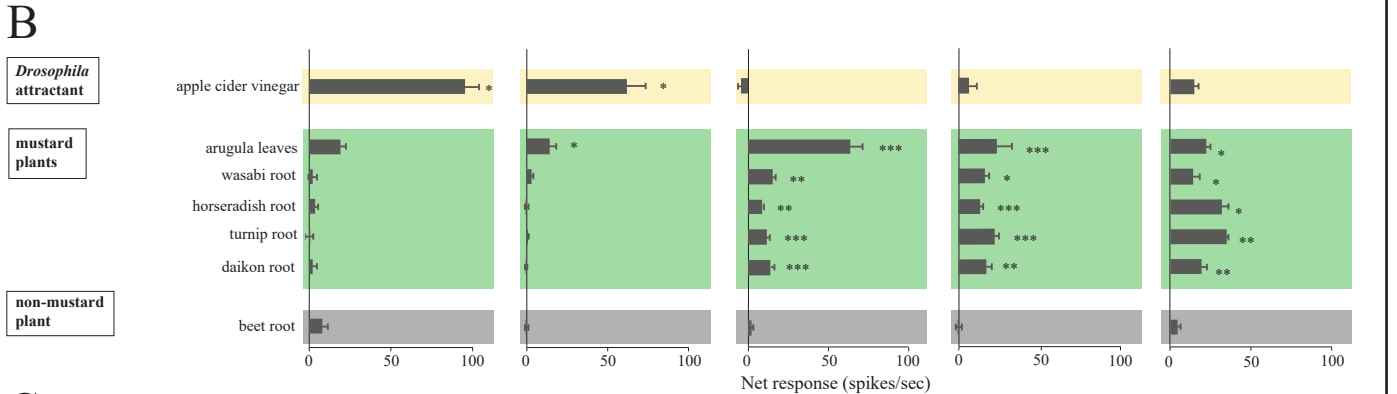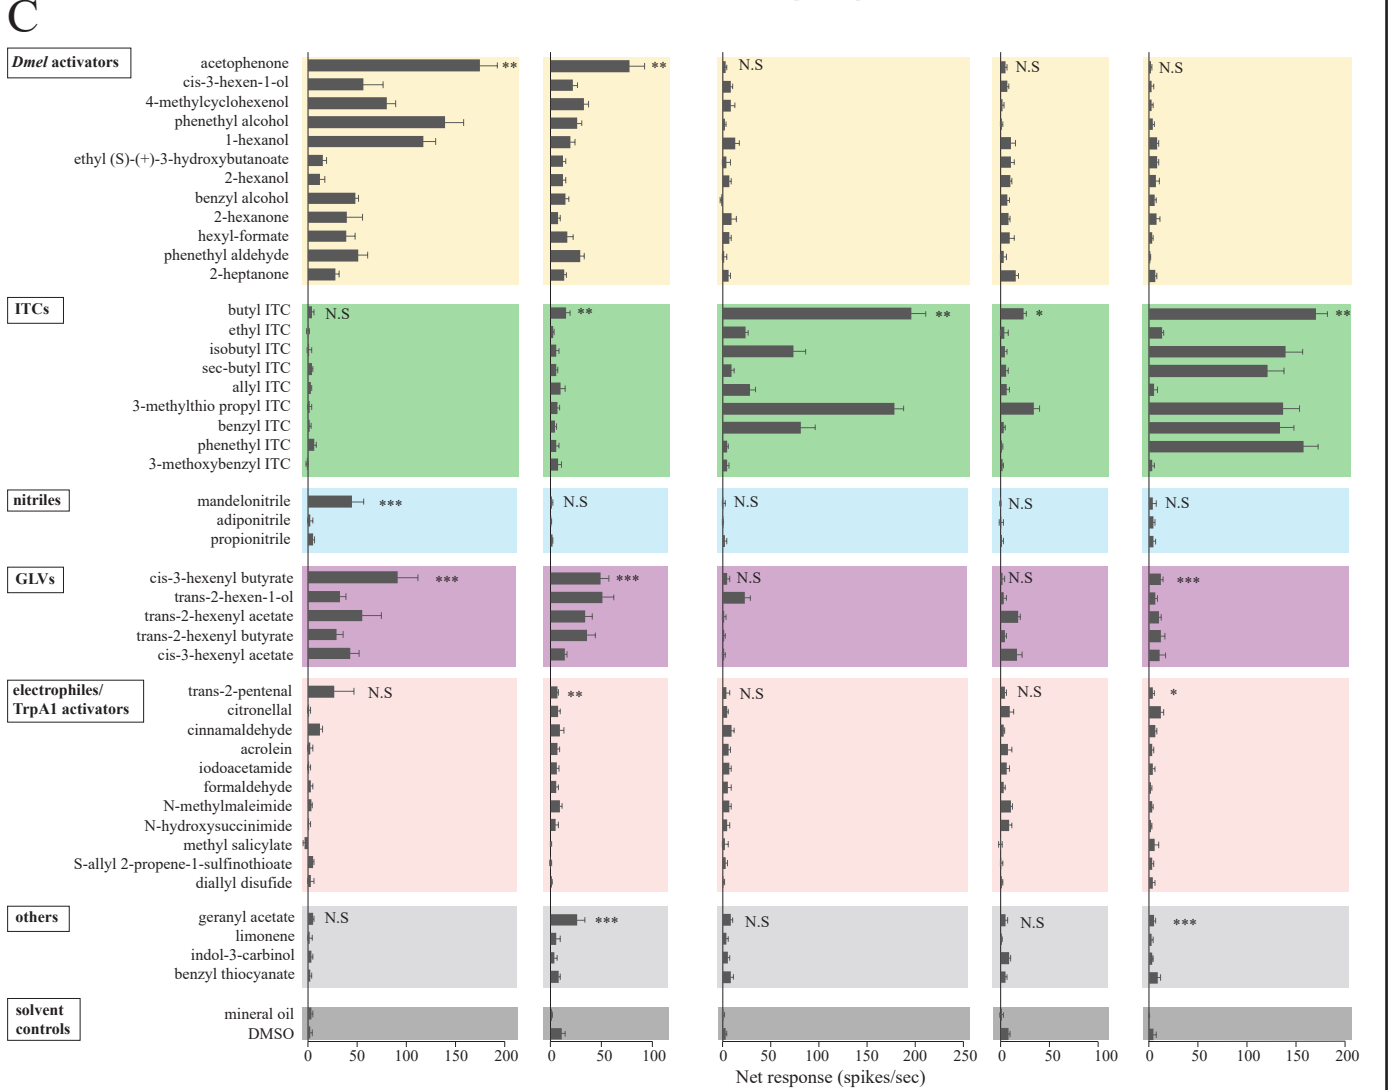

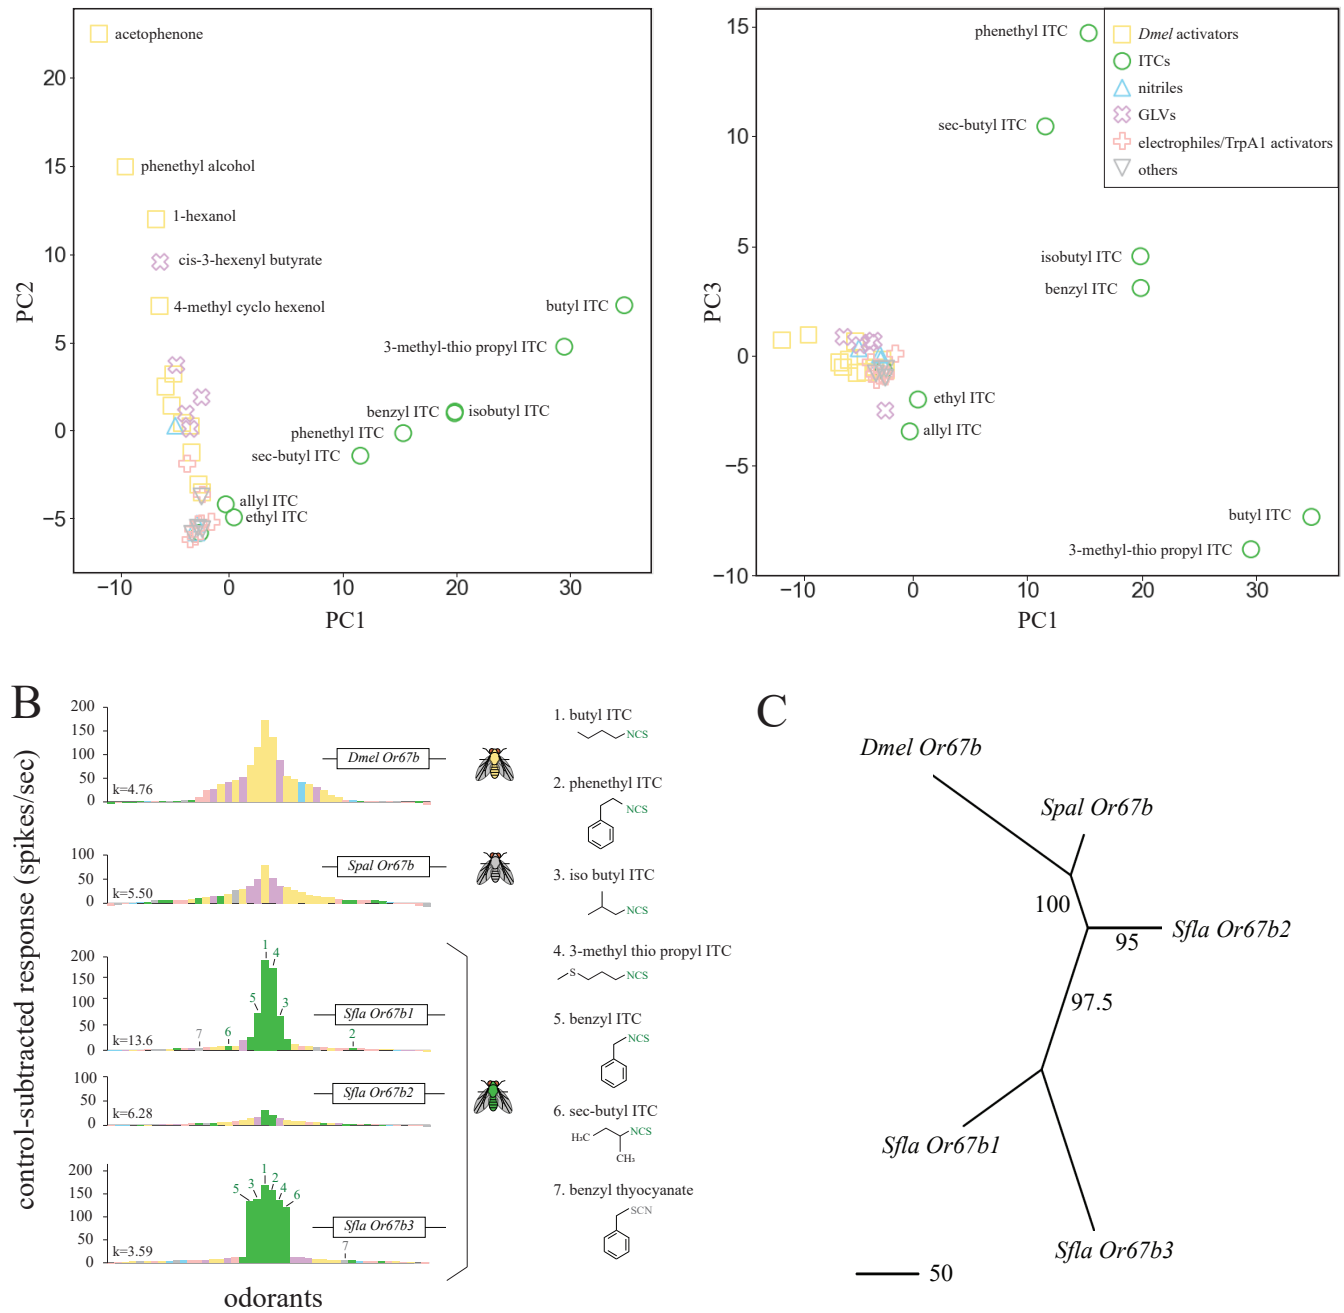

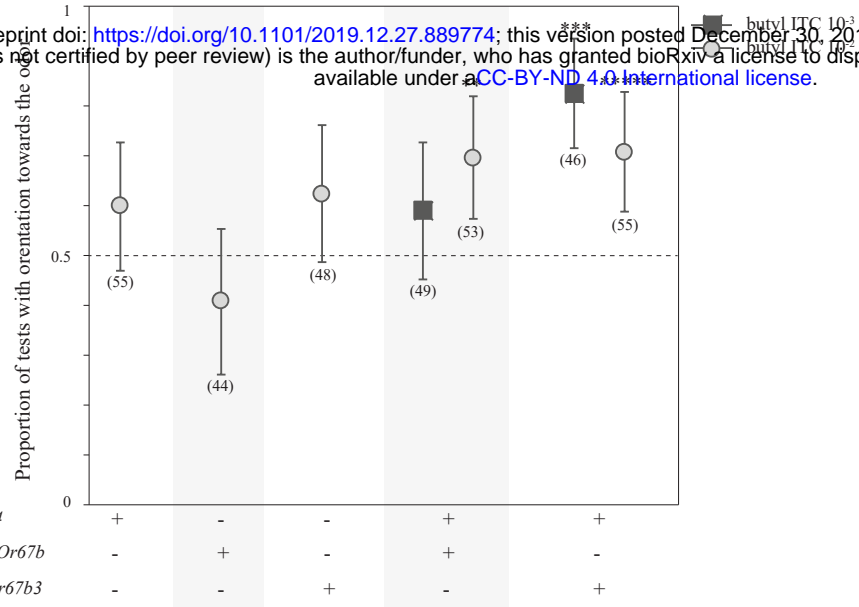

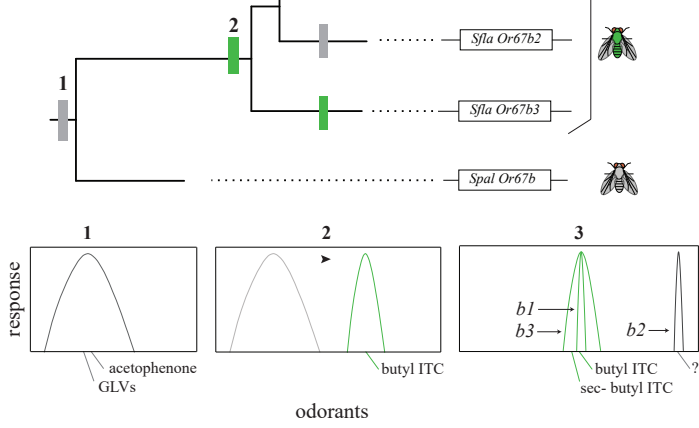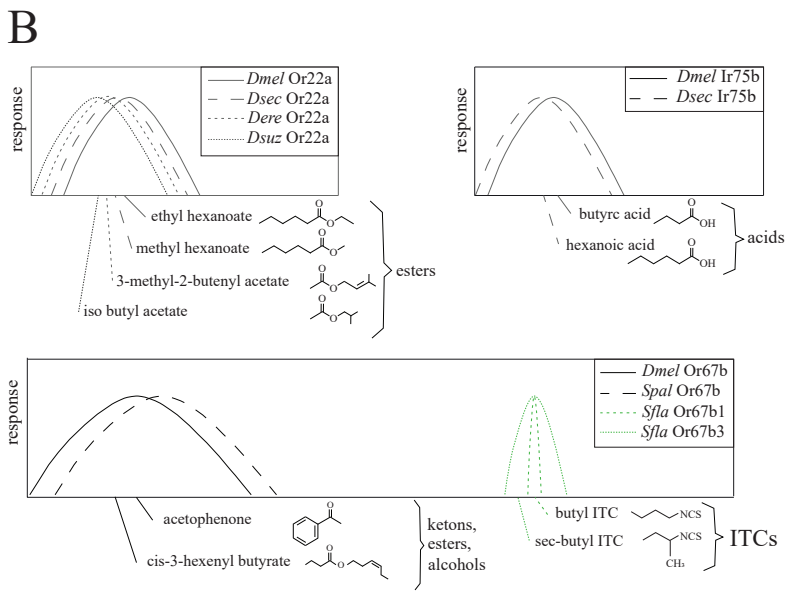

518 **Figure Legends:**

519

520 **Figure 1: Olfactory behavioral responses of *S. flava* and its microbe-feeding relatives *S.***

521 ***pallida* and *D. melanogaster* to mustard oil volatiles and ITCs.** (A) Schematic representation

522 of the dual-choice maze used to test the olfactory responses of flies. One arm of the maze was

523 connected to a 1-ml syringe containing a piece of filter paper loaded with an odorant (20  $\mu$ l of a

524 1:100 vol/vol solution diluted in mineral oil) or apple cider vinegar (40  $\mu$ l), while the other arm

525 was connected to a syringe containing a piece of filter paper loaded with the control stimulus (20

526  $\mu$ l of mineral oil or 40  $\mu$ l of water). In the case of arugula, 2-4 leaves were excised from a plant

527 just before tests and placed in a 5-ml syringe (the control syringe contained clean tissue paper).

528 In each test a group of non-starved flies (n=4) was anesthetized in ice during 50-60 seconds and

529 allowed to choose between the odor-laden or the odorless arm of the maze. Each test (maximum

530 duration=5 min) ended when the first insect (out of the 4 released) made a choice for one or the

531 other arm of the maze. (B) Olfactory behavioral responses of *D. melanogaster*, *S. pallida* and *S.*

532 *flava* to the odors and odorants indicated to the right. Data represent the proportion of tests in

533 which insects choose the odorous arm of the maze, and the error bars indicate the 95%

534 confidence interval of the proportion; the dotted reference line at 0.5 indicate no preference for

535 the odorous or odorless arm of the maze. Numbers between parentheses indicate the number of

536 tests with choices, either for the odorless or the odorous arm of the maze (on average, insects

537 made a choice in 82% of the tests). For each fly species and odor, data was analyzed using two-

538 tailed Binomial tests adjusted for multiple testing using FDR (adjusted p-values: \* p<0.05, \*\*

539 p<0.01, \*\*\* p<0.005, \*\*\*\* p<0.001). *S. flava* was attracted to mustard plant volatiles (arugula)

540 and ITCs and avoided apple cider vinegar volatiles, while *S. pallida* avoided butyl ITC. *D.*

541 *melanogaster* was attracted to vinegar but not to arugula volatiles or ITCs.

542 **Figure 2: Maximum likelihood (ML) phylogeny of *Or67bs* in Drosophilidae. (A)**

543 ML phylogeny reconstructed from protein translations of the *Ors* found in *S. flava*, *D.*  
544 *melanogaster*, *D. grimshawi*, *D. virilis* and *D. mojavensis* genomes. Line width of branches are  
545 proportional to bootstrap support. Green branches indicate *Scaptomyza Ors*. Gene names with  
546 bold fonts include branches with estimated  $dN/dS > 1$  from branch tests conducted in PAML,  
547 consistent with episodic positive selection. (B) ML phylogeny reconstructed from coding  
548 sequence of *Or67b* orthologs of twelve *Drosophila* species, *S. pallida* and *S. flava*. All bootstrap  
549 supports for the nodes are  $>80\%$  and all posterior probabilities were  $>0.95$  for the MrBayes tree.  
550 Branches with significant support (FDR  $p$ -value  $< 0.05$ ) for  $dN/dS$  values different from the  
551 background rate are indicated with colored branch labels (blue where the foreground rate is less  
552 than the background, and red where  $dN/dS$  is greater than the background). Only *S. flava* and *D.*  
553 *mojavensis* branches have significantly elevated  $dN/dS$  according to branch model tests. *S.*  
554 *flava*, *S. pallida* and *D. melanogaster* branches are indicated by fly icons colored as in Figure  
555 1. Scale bars are in units of substitutions per site.

556

557

558

559

560

561

562

563

564

565 **Figure 3: Odor responses of orthologous and paralogous Or67b from *D. melanogaster*, *S.***  
566 ***pallida* and *S. flava* to mustard-plant volatiles.**

567 (A) *Or67b* paralogs and orthologs were expressed in a *D. melanogaster* mutant that lacks its  
568 endogenous *Or* (*Or22a*) in the ab3A olfactory receptor neuron (30). Shown is a representative  
569 trace of a single sensillum recording obtained from a *D. melanogaster* fly with *Dmel Or67b*  
570 expressed in the ab3A neuron (*Or22a<sup>-/-</sup> Or22b<sup>-/-</sup>; Or22a-Gal4/UAS-Dmel Or67b*) (top left).  
571 Recordings from the ab3 sensilla produced spike trains from the two olfactory receptor cells  
572 housed within this sensilla (ab3A, which expresses *Or67b*, and ab3B, which expresses the native  
573 *Or85b*) that had distinct spike amplitudes. The ab3A neuron (labeled A) produced spikes of  
574 larger amplitude than the ab3B neuron (labeled B). Scale bar: 10 mV. Bottom: representative  
575 electrophysiological recordings obtained from the ab3 sensilla of flies expressing *Dmel Or67b*,  
576 *Spal Or67b*, *Sfla Or67b1*, *Sfla Or67b2* or *Or67b3* in the ab3A neuron in response to stimulation  
577 with acetophenone, butyl ITC, sec-butyl ITC and mineral oil (solvent control). The bars below  
578 records indicate the onset and duration (1 sec) of the odor stimulation. Calibration bars: 10 mV.

579 (B) Responses (net number of spikes/second; average  $\pm$  SE, n= 6-8 sensilla obtained from 2-4  
580 females) evoked by stimulation with apple cider vinegar, mustard plant volatiles and non-  
581 mustard plant volatiles (beet, control). Asterisks indicate significant differences between the  
582 responses to stimulation with an odor and the control stimulus (beet) (Mann-Whitney U tests  
583 corrected for multiple comparisons using FDR; adjusted p-values: \* p<0.05; \*\* p<0.01; \*\*\*  
584 p<0.005). Note that neurons expressing *Dmel Or67b* and *Spal Or67b*, but not those expressing  
585 any of the *S. flava Or67b* paralogs, respond to apple cider vinegar. Conversely, only neurons  
586 expressing *S. flava Or67b* paralogs respond to mustard plant volatiles; neurons expressing *Sfla*  
587 *Or67b3* responded to all mustard plant volatiles tested. (C) Responses (net number of spikes/sec;



588 average  $\pm$  SE, n= 6-20 for each odorant, n=6-15 for mineral oil, obtained from 2-7 females)  
589 evoked by stimulation with single odorants categorized as follows: *Dmel* Or67b activators  
590 (Database of Odor Responses, (33); orange), ITCs (green), nitriles (blue), green leaf volatiles  
591 (GLVs, purple), electrophiles/*TrpA1* activators (pink), other odorants not belonging to any of the  
592 previous categories (gray), and the two solvent controls (black). The responses of the strongest  
593 activator within each category (acetophenone, butyl ITC, mandelonitrile, cis-3-hexenyl butyrate,  
594 trans-2-pentenal, and geranyl acetate) were compared against the mineral oil control. Asterisks  
595 indicate significant differences between the responses to stimulation with each of these odorants  
596 and the control stimulus (statistics as described in B). Note that ITCs strongly activate neurons  
597 expressing *Sfla Or67b1* or *Sfla Or67b3*, and that for the most part these Ors do not respond to  
598 any of the other odorants tested. Some ITCs, such as sec-butyl ITC and phenethyl ITC, only  
599 activated neurons expressing *Sfla Or67b3*. *Spal* Or67b has an odorant response profile similar to  
600 that of *Dmel* Or67b, responding mostly to stimulation with *D. melanogaster* activators and  
601 GLVs.

602

603

604

605

606

607

608

609

610 **Figure 4: Or67b orthologs and paralogs have distinct and non-overlapping odor-response**  
611 **profiles, tuning breadths, and functional relatedness.** (A) Vectors quantifying the odor-  
612 evoked responses (control-subtracted) were projected onto a two-dimensional subspace  
613 determined by the first three principal components of the data-set (left: PC1 vs PC2; right: PC1  
614 vs PC3). PC1-3 captured each 63.1%, 26.0%, and 9.0% of the variances of the original five-  
615 dimensional data. Each dot represents one odorant, and the different colors and symbols indicate  
616 different chemical categories (as in Figure 3C and in the inset, right graph). (B) Tuning curves of  
617 each Or67b copy, showing the distribution of mean responses (n= 6-20) to the 44 odorants tested  
618 (color-coded as in A). The odorants are displayed along the horizontal axis according to the  
619 responses (net spikes/sec) they elicit from each Or. The odorants eliciting the strongest responses  
620 for each Or are located at the center of the distribution, while weaker activators are distributed  
621 along the edges of the distribution. Thus, the order of the odorants is different for the five Ors.  
622 Note that the strongest responses (center of the distribution) from *Dmel* Or67b and *Spal* Or67b  
623 are evoked by *D. melanogaster* activators and GLVs, while the strongest responses from all *Sfla*  
624 Or67b paralogs are evoked by ITCs. The tuning breadth of each Or is quantified by the kurtosis  
625 value (k) of the distribution with higher values indicating narrower odor-response profiles. The  
626 chemical structure of the top six *Sfla* Or67b3 activators and benzyl thiocyanate (numbers in  
627 green) are indicated to the right. (C) Neighbor joining cluster analysis for the five Or67b  
628 orthologs based on the Euclidean distances between the odor-evoked responses of the receptors.  
629 *Dmel* Or67b and *Spal* Or67b are consistently separated from the *S. flava* odor response profiles,  
630 and *Sfla* Or67b1 and *Sfla* Or67b3 are consistently joined, having similar response profiles.  
631  
632

633 **Figure 5: *S. flava Or67b3* confers olfactory sensitivity to ITCs**

634 The responses of *D. melanogaster* flies expressing *Dmel Or67b* or *Sfla Or67b3* under the control  
635 of *Gal4* in the “empty” neuron (ab3A neuron) and three control parental lines were conducted as  
636 described in the caption to Figure 1. Genotypes are indicated at the bottom. One arm of the maze  
637 was connected to a 1-ml syringe containing a piece of filter paper loaded with 20  $\mu$ l of 1:100  
638 vol/vol (gray circles) or 1:1,000 vol/vol (black rectangles) of butyl ITC, while the other arm was  
639 connected to a syringe containing a piece of filter paper loaded with 20  $\mu$ l of mineral oil. Data  
640 represent the proportion of tests in which insects choose the odorous arm of the maze; the  
641 deviation bars indicate the 95% confidence interval of the proportion. The dotted reference line  
642 at 0.5 indicate no preference for either arm of the maze; the numbers between parenthesis  
643 indicate the number of tests with choices for one or the other arm. Control flies (first three  
644 columns) showed no preference for either arm of the maze, even when tested with the highest  
645 concentration of butyl ITC (two-tailed Binomial tests, in all cases  $p > 0.1$ ). Note that flies carrying  
646 the *UAS-Sfla Or67b3* transgene under the control of *Gal4* in the ab3A neuron were attracted to  
647 both concentrations of butyl ITC (two-tailed Binomial tests, \*\*\*  $p < 0.005$ ; \*\*\*\*  $p < 0.001$ ). In  
648 contrast, flies carrying the *UAS-Dmel Or67b* transgene under the control of *Gal4* were attracted  
649 only to the highest concentration of the odorant (two-tailed Binomial tests, \*\* $p < 0.01$ ). At the  
650 lowest concentration, the response of flies carrying the *S. flava* transgene was different from the  
651 response of flies carrying the *D. melanogaster* transgene (Fisher Exact test,  $p < 0.05$ ). These  
652 results indicate that in these flies, *Sfla Or67b3* is sufficient to confer attraction to butyl ITC, a  
653 behavior that persists at low concentrations.

654

655

656 **Figure 6: A model for the evolution of *Or67b* and comparison of tuning curves of**  
657 **orthologous *Or22a*, *Ir75b* and *Or67b*** (A) The evolution of *Scaptomyza Or67b* begins with a  
658 shift in the tuning breadth and ligand specificity of an ancestral *Or67b*, from *Dmel* activators and  
659 GLVs to ITCs (neofunctionalization). Subsequent gene triplication of *Sfla Or67b* gave rise to  
660 three paralogous *Or67b* genes (*Sfla Or67b1*, *Sfla Or67b2*, and *Sfla Or67b3*). *Sfla Or67b1*  
661 evolved to become more narrowly tuned, specializing in the detection of a few ITCs  
662 (subfunctionalization), while *Sfla Or67b3* kept its ancestral, more broadly tuned state, responding  
663 to a broad range of ITCs. The ligands and tuning breadth of *Sfla Or67b2* remain unresolved in  
664 this model. (B) The ligand specificities of orthologous *Or22a*, *Ir75b*, and *Or67b*. The *Or22a*  
665 orthologs from *D. melanogaster* (*Dmel Or22a*), *D. sechellia* (*Dsec Or22a*), *D. erecta* (*Der*  
666 *Or22a*), and *D. suzukii* (*Dsuz Or22a*) are all strongly activated by the host-derived esters  
667 indicated (top left; ref. 16, 17, 42, 43). The *Ir75b* orthologs from *D. melanogaster* (*Dmel Ir75b*),  
668 and *D. sechellia* (*Dsec Ir75b*) are strongly activated by the two acids indicated (top right; ref.  
669 15). *Dmel Or67b* and *Spal Or67b* are strongly activated by acetophenone, while *Sfla Or67b*  
670 copies are activated by ITCs only (bottom). Note that *Or22a* and *Ir75b* orthologs are both  
671 divergent but activated by ligands belonging to a single chemical class (esters and acids,  
672 respectively). In contrast, the ligands of orthologous *Or67b* from *Dmel* and *Spal* are responsive  
673 to a variety of chemical classes which include alcohols, aldehydes and ketones, whereas *Sfla*  
674 *Or67b* orthologs are responsive to an entirely different chemical class (ITCs).

675

676

677

678

679 **References:**

- 680 1. G. Frankel, The raison d'etre of secondary plant substances. *Science* **129**, 1466–1470  
681 (1959).
- 682 2. I. Winde, U. Wittstock, Insect herbivore counteradaptations to the plant glucosinolate–  
683 myrosinase system. *Phytochemistry* **72**, 1566–1575 (2011).
- 684 3. A. D. Gloss, *et al.*, Evolution in an ancient detoxification pathway is coupled with a  
685 transition to herbivory in the Drosophilidae. *Mol. Biol. Evol.* **31**, 2441–2456 (2014).
- 686 4. A. Kergunteuil, S. Dugravot, A. Mortreuil, A. Le Ralec, A. M. Cortesero, Selecting  
687 volatiles to protect brassicaceous crops against the cabbage root fly, *Delia radicum*.  
688 *Entomol. Exp. Appl.* **144**, 69–77 (2012).
- 689 5. B. Al-Anzi, W. D. Tracey Jr, S. Benzer, Response of *Drosophila* to wasabi is mediated by  
690 painless, the fly homolog of mammalian TRPA1/ANKTM1. *Curr. Biol.* **16**, 1034–1040  
691 (2006).
- 692 6. T. Ohta, T. Imagawa, S. Ito, Novel agonistic action of mustard oil on recombinant and  
693 endogenous porcine transient receptor potential V1 (pTRPV1) channels. *Biochemical*  
694 *Pharmacology* **73**, 1646–1656 (2007).
- 695 7. L. J. Macpherson, *et al.*, Noxious compounds activate TRPA1 ion channels through  
696 covalent modification of cysteines. *Nature* **445**, 541–545 (2007).
- 697 8. K. Kang, *et al.*, Analysis of *Drosophila* TRPA1 reveals an ancient origin for human  
698 chemical nociception. *Nature* **464**, 597–600 (2010).
- 699 9. O. M. Arenas, *et al.*, Activation of planarian TRPA1 by reactive oxygen species reveals a  
700 conserved mechanism for animal nociception. *Nat. Neurosci.* **20**, 1686–1693 (2017).
- 701 10. A. Hinman, H.-H. Chuang, D. M. Bautista, D. Julius, TRP channel activation by reversible  
702 covalent modification. *Proc. Natl. Acad. Sci. U. S. A.* **103**, 19564–19568 (2006).
- 703 11. R. M. Joseph, J. R. Carlson, *Drosophila* chemoreceptors: A molecular interface between the  
704 chemical world and the brain. *Trends in Genetics* **31**, 683–695 (2015).
- 705 12. C. Gomez-Diaz, F. Martin, J. M. Garcia-Fernandez, E. Alcorta, The two main olfactory  
706 receptor families in *Drosophila*, ORs and IRs: A Comparative Approach. *Front. Cell.*  
707 *Neurosci.* **12**, 253 (2018).
- 708 13. A. Sanchez-Gracia, F. G. Vieira, J. Rozas, “Molecular evolution of the major chemosensory  
709 gene families in insects. *Heredity* (Edinb). 2009; 103 (3): 208-16” (Epub 2009/05/14. doi:  
710 10.1038/hdy. 2009.55. PubMed PMID: 19436326).

- 712 14. P. Brand, S. R. Ramírez, The Evolutionary Dynamics of the Odorant Receptor Gene Family  
713 in Corbiculate Bees. *Genome Biol. Evol.* **9**, 2023–2036 (2017).
- 714 15. L. L. Prieto-Godino, *et al.*, Evolution of acid-sensing olfactory circuits in drosophilids.  
715 *Neuron* **93**, 661–676.e6 (2017).
- 716 16. S. Mansourian, *et al.*, Wild African *Drosophila melanogaster* are seasonal specialists on  
717 marula fruit. *Curr. Biol.* **28**, 3960–3968.e3 (2018).
- 718 17. J. Linz, *et al.*, Host plant-driven sensory specialization in *Drosophila erecta*. *Proc. Biol. Sci.*  
719 **280**, 20130626 (2013).
- 720 18. N. K. Whiteman, *et al.*, Mining the plant-herbivore interface with a leafmining *Drosophila*  
721 of *Arabidopsis*. *Mol. Ecol.* **20**, 995–1014 (2011).
- 722 19. B. Goldman-Huertas, *et al.*, Evolution of herbivory in *Drosophilidae* linked to loss of  
723 behaviors, antennal responses, odorant receptors, and ancestral diet. *Proc. Natl. Acad. Sci.*  
724 *U. S. A.* **112**, 3026–3031 (2015).
- 725 20. C. E. Reisenman, Y. Lee, T. Gregory, P. G. Guerenstein, Effects of starvation on the  
726 olfactory responses of the blood-sucking bug *Rhodnius prolixus*. *J. Insect Physiol.* **59**, 717–  
727 721 (2013).
- 728 21. C. P. Faucher, M. Hilker, M. de Bruyne, Interactions of carbon dioxide and food odours in  
729 *Drosophila*: olfactory hedonics and sensory neuron properties. *PLoS One* **8**, e56361 (2013).
- 730 22. L. W. Aurand, J. A. Singleton, T. A. Bell, J. L. Etchells, Volatile components in the vapors  
731 of natural and distilled vinegars. *J. Food Sci.* **31**, 172–177 (1966).
- 732 23. F. J. Cousin, *et al.*, Microorganisms in fermented apple beverages: Current knowledge and  
733 future directions. *Microorganisms* **5** (2017).
- 734 24. A. D. Gloss, *et al.*, Evolution of herbivory remodels a *Drosophila* genome. *bioRxiv*, 767160  
735 (2019).
- 736 25. C. S. McBride, J. R. Arguello, B. C. O’Meara, Five *Drosophila* genomes reveal nonneutral  
737 evolution and the signature of host specialization in the chemoreceptor superfamily.  
738 *Genetics* **177**, 1395–1416 (2007).
- 739 26. Z. Yang, PAML 4: phylogenetic analysis by maximum likelihood. *Mol. Biol. Evol.* **24**,  
740 1586–1591 (2007).
- 741 27. T. S. Ha, D. P. Smith, A pheromone receptor mediates 11-cis-vaccenyl acetate-induced  
742 responses in *Drosophila*. *J. Neurosci.* **26**, 8727–8733 (2006).
- 743 28. D. J. Hoare, *et al.*, Modeling peripheral olfactory coding in *Drosophila* larvae. *PLoS One* **6**,  
744 e22996 (2011).

- 745 29. S. G. Chin, S. E. Maguire, P. Huoviala, G. S. X. E. Jefferis, C. J. Potter, Olfactory neurons  
746 and brain centers directing oviposition decisions in *Drosophila*. *Cell Rep.* **24**, 1667–1678  
747 (2018).
- 748 30. E. A. Hallem, J. R. Carlson, Coding of odors by a receptor repertoire. *Cell* **125**, 143–160  
749 (2006).
- 750 31. F. Gonzalez, P. Witzgall, W. B. Walker, Protocol for heterologous expression of insect  
751 odourant receptors in *Drosophila*. *Front. Ecol. Evol.* **4**, 189 (2016).
- 752 32. A. A. Agrawal, N. S. Kurashige, A role for isothiocyanates in plant resistance against the  
753 specialist herbivore *Pieris rapae*. *J. Chem. Ecol.* **29**, 1403–1415 (2003).
- 754 33. D. Münch, C. G. Galizia, DoOR 2.0--Comprehensive mapping of *Drosophila melanogaster*  
755 odorant responses. *Sci. Rep.* **6**, 21841 (2016).
- 756 34. S. F. Vaughn, M. A. Berhow, Glucosinolate hydrolysis products from various plant sources:  
757 pH effects, isolation, and purification. *Industrial Crops and Products* **21**, 193–202 (2005).
- 758 35. P. R. Ehrlich, P. H. Raven, Butterflies and plants: A study in coevolution. *Evolution* **18**,  
759 586–608 (1964).
- 760 36. J. A. Depree, T. M. Howard, G. P. Savage, Flavour and pharmaceutical properties of the  
761 volatile sulphur compounds of Wasabi (*Wasabia japonica*). *Food Res. Int.* **31**, 329–337  
762 (1998).
- 763 37. E. A. Bernays, Evolution of Feeding Behavior in Insect Herbivores: Success seen as  
764 different ways to eat without being eaten. *Bioscience* **48**, 35–44 (1998).
- 765 38. S. Ohno, The enormous diversity in genome sizes of fish as a reflection of nature's  
766 extensive experiments with gene duplication. *Trans. Am. Fish. Soc.* **99**, 120–130 (1970).
- 767 39. H. M. Heidel-Fischer, *et al.*, An insect counteradaptation against host plant defenses  
768 evolved through concerted neofunctionalization. *Mol. Biol. Evol.* **36**, 930–941 (2019).
- 769 40. X. He, J. Zhang, Rapid subfunctionalization accompanied by prolonged and substantial  
770 neofunctionalization in duplicate gene evolution. *Genetics* **169**, 1157–1164 (2005).
- 771 41. R. Assis, D. Bachtrog, Neofunctionalization of young duplicate genes in *Drosophila*. *Proc.*  
772 *Natl. Acad. Sci. U. S. A.* **110**, 17409–17414 (2013).
- 773 42. T. Dekker, I. Ibba, K. P. Siju, M. C. Stensmyr, B. S. Hansson, Olfactory shifts parallel  
774 superspecialism for toxic fruit in *Drosophila melanogaster* sibling, *D. sechellia*. *Curr. Biol.*  
775 **16**, 101–109 (2006).
- 776 43. I. Keeseey, *et al.*, Evolution of a pest: towards the complete neuroethology of *Drosophila*  
777 *suzukii* and the subgenus *Sophophora*. *BioRxiv* (2019).

- 778 44. J. A. A. Renwick, M. Haribal, S. Gouinguéné, E. Städler, Isothiocyanates stimulating  
779 oviposition by the diamondback moth, *Plutella xylostella*. *J. Chem. Ecol.* **32**, 755–766  
780 (2006).
- 781 45. C. Tait, S. Batra, S. S. Ramaswamy, J. L. Feder, S. B. Olsson, Sensory specificity and  
782 speciation: a potential neuronal pathway for host fruit odour discrimination in *Rhagoletis*  
783 *pomonella*. *Proc. Biol. Sci.* **283** (2016).
- 784 46. J. J. Wiens, R. T. Lapoint, N. K. Whiteman, Herbivory increases diversification across  
785 insect clades. *Nat. Commun.* **6**, 8370 (2015).
- 786 47. C. Mitter, B. Farrell, B. Wiegmann, The phylogenetic study of adaptive zones: Has  
787 phytophagy promoted insect diversification? *Am. Nat.* **132**, 107–128 (1988).
- 788 48. J. H. Zar, *Biostatistical Analysis* (Prentice Hall, 1999).
- 789 49. Y. Benjamini, Y. Hochberg, Controlling the false discovery rate: A practical and powerful  
790 approach to multiple testing. *Journal of the Royal Statistical Society: Series B*  
791 *(Methodological)* **57**, 289–300 (1995).
- 792 50. J. Thurmond, *et al.*, FlyBase 2.0: the next generation. *Nucleic Acids Res.* **47**, D759–D765  
793 (2019).
- 794 51. K. Katoh, MAFFT: a novel method for rapid multiple sequence alignment based on fast  
795 Fourier transform. *Nucleic Acids Research* **30**, 3059–3066 (2002).
- 796 52. L.-T. Nguyen, H. A. Schmidt, A. von Haeseler, B. Q. Minh, IQ-TREE: A fast and effective  
797 stochastic algorithm for estimating maximum-likelihood phylogenies. *Molecular Biology*  
798 *and Evolution* **32**, 268–274 (2015).
- 799 53. A. Stamatakis, RAxML version 8: a tool for phylogenetic analysis and post-analysis of  
800 large phylogenies. *Bioinformatics* **30**, 1312–1313 (2014).
- 801 54. F. Ronquist, *et al.*, MrBayes 3.2: efficient Bayesian phylogenetic inference and model  
802 choice across a large model space. *Syst. Biol.* **61**, 539–542 (2012).
- 803 55. S. Guindon, *et al.*, New Algorithms and methods to estimate maximum-likelihood  
804 phylogenies: Assessing the performance of PhyML 3.0. *Systematic Biology* **59**, 307–321  
805 (2010).
- 806 56. R. C. Team, R: a language and environment for statistical computing [online]. R Foundation  
807 for Statistical Computing, Vienna, Austria (2018).
- 808 57. E. Paradis, K. Schliep, ape 5.0: an environment for modern phylogenetics and evolutionary  
809 analyses in R. *Bioinformatics* **35**, 526–528 (2019).
- 810 58. E. A. Hallem, J. R. Carlson, The odor coding system of *Drosophila*. *Trends in Genetics* **20**,  
811 453–459 (2004).



- 812 59. R. T. Lapoint, P. M. O’Grady, N. K. Whiteman, Diversification and dispersal of the  
813 Hawaiian Drosophilidae: the evolution of *Scaptomyza*. *Mol. Phylogenet. Evol.* **69**, 95–108  
814 (2013).
- 815 60. J. Bischof, R. K. Maeda, M. Hediger, F. Karch, K. Basler, An optimized transgenesis  
816 system for *Drosophila* using germ-line-specific  $\phi$ C31 integrases. *Proc. Natl. Acad. Sci. U.*  
817 *S. A.* **104**, 3312–3317 (2007).

818

819

820

821

822

823

824

825

826

827

828

829

830

831

832

**Table S1: Parameters from Odorant Receptor molecular evolution analyses**

| Test* | Branch†               | background<br>dN/dS | foreground<br>dN/dS | dN – dS       | FDR<br>adjusted p-<br>value |
|-------|-----------------------|---------------------|---------------------|---------------|-----------------------------|
| OR    | Or2a                  | 0.10948             | 0.08368             | -1.1523       | 0.4031933                   |
| OR    | Or10a                 | 0.16074             | 0.08826             | -0.5837       | <b>0.03599091</b>           |
| OR    | Or13a1                | 0.13815             | 0.95538             | -0.0014       | <b>8.36204E-06</b>          |
| OR    | Or13a2                | 0.14485             | 0.29386             | -0.0114       | 0.5374215                   |
| OR    | Or13a ancestor        | 0.1405              | 0.22696             | -0.2232       | 0.1062494                   |
| OR    | Or19a                 | 0.27184             | 0.256               | -0.3699       | 0.8337806                   |
| OR    | Or22c                 | 0.15572             | 0.25996             | -0.1496       | 0.1475187                   |
| OR    | Or23a                 | 0.16331             | 0.2829              | -0.2438       | 0.0934421                   |
| OR    | Or24a                 | 0.08324             | 0.09358             | -0.5121       | 0.7036877                   |
| OR    | Or30a                 | 0.07027             | 0.10685             | -0.4864       | 0.1396827                   |
| OR    | Or33c                 | 0.20981             | 0.15322             | -0.402        | 0.2748754                   |
| OR    | Or35a                 | 0.10058             | 0.80581             | -0.2963       | <b>0.00245945</b>           |
| OR    | Or42a1                | 0.10806             | 0.11791             | -0.336        | 0.7716366                   |
| OR    | Or42a2                | 0.10578             | 0.80581             | -0.012        | <b>0.000970903</b>          |
| OR    | Or42a3                | 0.10571             | 0.80581             | -0.0045       | <b>0.000643469</b>          |
| OR    | Or42a2 and 3 ancestor | 0.11046             | 0.08409             | -0.5505       | 0.3637872                   |
| OR    | Or43a                 | 0.14775             | 0.08518             | -0.3217       | 0.1557934                   |
| OR    | Or45b                 | 0.10067             | 0.10449             | -0.3992       | 0.8803498                   |
| OR    | Or46a                 | 0.14313             | 0.20832             | -0.2632       | 0.1151226                   |
| OR    | Or47b                 | 0.16957             | 0.15781             | -0.3375       | 0.8025064                   |
| OR    | Or49a                 | 0.19774             | 0.17914             | -0.5377       | 0.7036877                   |
| OR    | Or49b                 | 0.10784             | 0.05836             | -0.3747       | 0.09592573                  |
| OR    | Or56a                 | 0.12598             | 0.05652             | -0.5602       | <b>0.004298517</b>          |
| OR    | Or59a                 | 0.1085              | 0.31529             | -0.2475       | <b>0.000415309</b>          |
| OR    | Or59b                 | 0.09936             | 0.23227             | -0.4421       | <b>0.000415309</b>          |
| OR    | Or63a1                | 0.12346             | ∞                   | <b>0.0172</b> | <b>3.51892E-05</b>          |
| OR    | Or63a2                | 0.12136             | ∞                   | <b>0.0274</b> | <b>1.35815E-09</b>          |
| OR    | Or63a ancestor        | 0.10903             | 0.56602             | -0.1212       | <b>5.0862E-13</b>           |
| OR    | Or67a1                | 0.20346             | 0.13116             | -0.528        | 0.0934421                   |
| OR    | Or67a2                | 0.2067              | <b>0.06369</b>      | -0.0693       | <b>0.0004729</b>            |
| OR    | Or67b1                | 0.11719             | 0.87005             | -0.0059       | <b>2.5914E-07</b>           |

|    |                          |         |                |               |                    |
|----|--------------------------|---------|----------------|---------------|--------------------|
| OR | Or67b2                   | 0.11479 | 0.69462        | -0.0253       | <b>1.96849E-09</b> |
| OR | Or67b3                   | 0.10844 | <b>1.95161</b> | <b>0.0414</b> | <b>9.78045E-20</b> |
| OR | Or67b1 and 2 ancestor    | 0.11932 | $\infty$       | <b>0.0282</b> | <b>3.90702E-08</b> |
| OR | Or67b1, 2 and 3 ancestor | 0.11679 | 0.28275        | -0.2591       | <b>0.000585544</b> |
| OR | Or67c                    | 0.05491 | 0.07255        | -0.4886       | 0.4029281          |
| OR | Or67d                    | 0.12277 | <b>7.22359</b> | <b>0.0948</b> | <b>2.56153E-05</b> |
| OR | Or69a                    | 0.21665 | 0.12519        | -0.4274       | 0.05279388         |
| OR | Or71a                    | 0.15846 | 0.25285        | -0.3464       | 0.1151226          |
| OR | Or74a1                   | 0.13897 | 0.16825        | -0.3766       | 0.5728869          |
| OR | Or74a2                   | 0.13723 | 0.18825        | -0.4375       | 0.2932306          |
| OR | Or82a                    | 0.12569 | 0.18201        | -0.2805       | 0.1926929          |
| OR | Or83a                    | 0.0967  | 0.13983        | -0.4518       | 0.148133           |
| OR | Or83c1                   | 0.16267 | 0.21756        | -0.4381       | 0.3145556          |
| OR | Or83c2                   | 0.22615 | 0.41682        | -0.1561       | 0.0934421          |
| OR | Or83c3                   | 0.22488 | 0.39035        | -0.2043       | 0.0934421          |
| OR | Or83c2 and 3 ancestor    | 0.25561 | 0.17609        | -0.2679       | 0.5410598          |
| OR | Or85aLike                | 0.22488 | 0.39035        | -1.8882       | <b>0.001826812</b> |
| OR | Or85bc                   | 0.19387 | <b>0.07261</b> | -0.32         | 0.2783313          |
| OR | Or85e                    | 0.15034 | 0.20391        | -0.3561       | 0.6592839          |
| OR | Or85f                    | 0.11206 | 0.13076        | -0.4139       | 0.08611496         |
| OR | Or88a                    | 0.18031 | 0.09816        | -0.2848       | <b>0.003678095</b> |
| OR | Or92a                    | 0.14147 | 0.32458        | -0.3894       | <b>3.51892E-05</b> |
| OR | Or94a                    | 0.044   | 0.13816        | -0.4616       | 0.1933             |
| OR | Or94b                    | 0.09284 | 0.14353        | -0.5473       | 0.09592573         |
| OR | Or98a1                   | 0.09893 | 0.17168        | <b>0.0013</b> | 0.1796849          |
| OR | Or98a3                   | 0.18051 | 1.69406        | -0.0093       | 0.6770641          |
| OR | Or98a7                   | 0.18219 | 0.28105        | <b>0.0258</b> | <b>5.47517E-05</b> |
| OR | Or98a1 and 3 ancestor    | 0.14909 | <b>2.74217</b> | -0.0113       | <b>0.00014207</b>  |
| OR | Or98a1, 3 and 7 ancestor | 0.15018 | 0.81658        | -0.6623       | 0.7716366          |
| OR | Or98a2                   | 0.18749 | 0.17369        | -0.024        | 0.7716366          |
| OR | Or98a6                   | 0.24649 | 0.30314        | -0.044        | 0.6592839          |
| OR | Or98a2 and 6 ancestor    | 0.24491 | 0.30931        | -0.33         | 0.0934421          |
| OR | Or98a4                   | 0.2739  | 0.14173        | <b>0.0063</b> | <b>0.000676304</b> |
| OR | Or98a5                   | 0.22865 | <b>1.23866</b> | <b>0.01</b>   | 0.05279388         |
| OR | Or98a4 and 5 ancestor    | 0.237   | 4.11669        | -0.4823       | <b>0.01935304</b>  |

|       |                                                    |         |                |               |                    |
|-------|----------------------------------------------------|---------|----------------|---------------|--------------------|
| OR    | Or98b1                                             | 0.28857 | <b>0.13007</b> | -0.8492       | 0.7613693          |
| OR    | Or98bLike                                          | 0.18605 | 0.20625        | -0.8656       | 0.5728869          |
| OR    | OrN1                                               | 0.19137 | 0.15525        | -0.3194       | 0.1960608          |
| OR    | OrN2 copy 1                                        | 0.02988 | 0.07861        | -0.0006       | 0.1278416          |
| OR    | OrN2 copy 4                                        | 0.14809 | 0.21155        | <b>0.0008</b> | 0.05293525         |
| OR    | OrN2 copy 5                                        | 0.2495  | 0.94941        | -0.6183       | 0.08611496         |
| OR    | OrN2 copy 6                                        | 0.24826 | 1.05198        | -0.8924       | 0.1151226          |
| OR    | OrN2 copy 1 and 4 ancestor                         | 0.26274 | 0.16626        | -0.4861       | 0.5728869          |
| OR    | Orco                                               | 0.26137 | 0.17749        | -0.2037       | <b>0.02049901</b>  |
| OR67b | <i>D. grimshawi</i>                                | 0.24934 | 0.29184        | -0.3355       | 0.7873258          |
| OR67b | <i>S. flava</i> copy 3                             | 0.1041  | <b>1.803</b>   | <b>0.0375</b> | <b>1.44394E-21</b> |
| OR67b | <i>S. flava</i> copy 2                             | 0.10935 | <b>0.7393</b>  | -0.0208       | <b>1.05769E-10</b> |
| OR67b | <i>S. flava</i> copy 1                             | 0.11251 | <b>0.62856</b> | -0.022        | <b>1.5606E-06</b>  |
| OR67b | <i>S. pallida</i>                                  | 0.1236  | 0.0506         | -0.3076       | <b>0.01604471</b>  |
| OR67b | <i>D. mojavensis</i>                               | 0.1137  | <b>0.2053</b>  | -0.8484       | <b>0.009320281</b> |
| OR67b | <i>D. virilis</i>                                  | 0.119   | 0.1185         | -1.4528       | 0.9933245          |
| OR67b | <i>D. melanogaster</i>                             | 0.11971 | 0.04714        | -0.0423       | 0.4999046          |
| OR67b | <i>D. sechellia</i>                                | 0.1193  | 0.0796         | -0.0368       | 0.6982622          |
| OR67b | <i>D. simulans</i>                                 | 0.1202  | 0.0197         | -0.0523       | <b>0.04609565</b>  |
| OR67b | <i>D. yakuba</i>                                   | 0.1198  | 0.0914         | -0.1247       | 0.614736           |
| OR67b | <i>D. erecta</i>                                   | 0.1193  | 0.1051         | -0.1126       | 0.7873258          |
| OR67b | <i>D. ananassae</i>                                | 0.1329  | 0.0303         | -1.7359       | <b>5.2654E-10</b>  |
| OR67b | <i>D. persimilis</i>                               | 0.1188  | 0.1803         | -0.0103       | 0.7873258          |
| OR67b | <i>D. pseudoobscura</i>                            | 0.119   | 0.1149         | -0.0078       | 0.9933245          |
| OR67b | <i>D. willistoni</i>                               | 0.1288  | 0.0427         | -1.4866       | <b>1.97605E-05</b> |
| OR67b | Subgenus <i>Drosophila</i> Ancestor                | 0.1236  | 0.0564         | -0.9778       | <b>0.01967709</b>  |
| OR67b | <i>Sophophora</i> minus <i>D. willistoni</i>       | 0.1212  | 0.0711         | -0.5393       | 0.3034497          |
| OR67b | virilis-repleta radiation                          | 0.1196  | 0.0905         | -0.1587       | 0.7873258          |
| OR67b | Hawaiian radiation ancestor                        | 0.1198  | 0.0979         | -0.2595       | 0.7817405          |
| OR67b | <i>Scaptomyza</i> genus ancestor                   | 0.1221  | 0.0435         | -0.2512       | <b>0.04498955</b>  |
| OR67b | <i>S. flava</i> copy 1, 2 and 3 ancestor           | 0.1094  | <b>0.4081</b>  | -0.1282       | <b>4.06804E-07</b> |
| OR67b | <i>S. flava</i> copy 1 and 2 ancestor              | 0.1135  | ∞              | <b>0.0276</b> | <b>4.5389E-09</b>  |
| OR67b | <i>D. simulans</i> and <i>D. sechelia</i> ancestor | 0.1205  | 0.0001         | -0.0564       | <b>0.01202915</b>  |
| OR67b | <i>D. yakuba</i> and <i>D. erecta</i> ancestor     | 0.1221  | 0.0196         | -0.1444       | <b>0.00128517</b>  |
| OR67b | melanogaster subgroup minus Dmel                   | 0.1201  | 0.048          | -0.0727       | 0.2412147          |

|       |                                 |        |        |         |                    |
|-------|---------------------------------|--------|--------|---------|--------------------|
| OR67b | melanogaster subgroup ancestor  | 0.125  | 0.0446 | -0.5921 | <b>0.003348616</b> |
| OR67b | melanogaster group ancestor     | 0.1207 | 0.0634 | -0.2523 | 0.4817083          |
| OR67b | pseudoobscura subgroup ancestor | 0.1291 | 0.0342 | -0.9693 | <b>2.39766E-06</b> |

**Table S1:** Parameters for background *versus* foreground branch tests in PAML. \* OR = Branch tests for differences in dN/dS rates among *Scaptomyza flava* copies of odorant receptor genes. OR67b = Branch tests for differences in dN/dS rates among all individual branches in a phylogeny of *Or67b* homologs in *Scaptomyza* and *Drosophila* spp. † Terminal branches are indicated with gene names. Ancestral branches are indicated with the term “ancestor” and a list of the terminal branches or the clade subtended.

**TableS2 PCR Primers**

| Primer Name | Sequence                           | Primer role          |
|-------------|------------------------------------|----------------------|
| 67b12Fb     | cATGAAGGACTTATTGGATCTGGAGCTAG      | CDS amplification    |
| 67b1Rb      | agcgcaTTATTTGTCTCTCATATTGCTC       | CDS amplification    |
| 67b2Rb      | agcgcaTTATTCATCTCTCATGTTACGC       | CDS amplification    |
| 67b3Fb      | cATGAACTTATTGGATATGGAGCTAG         | CDS amplification    |
| 67b3Rb      | agcgcaTTATTTGTTAGATAAATTACGC       | CDS amplification    |
| Sp67bFb     | cATGAAAACCTATTGGACCGGAAG           | CDS amplification    |
| Sp67bRb     | aaagtacaTCATTTGTTATTCATATTACGCAAAG | CDS amplification    |
| b1EcoRIF    | GACgaattcATGAAGGACTTATTGG          | RE cut site addition |
| b1KpnIR     | GACggtaccTTATTTGTCTCTCATATTG       | RE cut site addition |
| b2KpnIR     | GACggtaccTTATTCATCTCTCATG          | RE cut site addition |
| b3KpnIR     | GACggtaccTTATTTGTTAGATAAATTACG     | RE cut site addition |
| PalEcoRIF   | GACgaattcATGAAAACCTATTGGACC        | RE cut site addition |
| PalKpnIR    | GACggtaccTCATTTGTTATTCATATTACG     | RE cut site addition |

**Tables S2:** Nucleotides in lower case are either in untranslated sequence (CDS amplification) or are restriction enzyme cut sites (RE cut site addition). CDS amplification primers were used to amplify full *Or67b* CDS sequence from cDNA. Primers labeled “RE cut site addition” were used to engineer restriction enzyme cut-sites via PCR mutagenesis in order to ligate *Or67b* CDS sequences into the pUASTattB plasmid. All sequences are listed in a 5’ to 3’ orientation.

| Odors            | "Empty neuron" |   | WT Or22a       |    |
|------------------|----------------|---|----------------|----|
|                  | spikes         | n | spikes         | n  |
| ethyl hexanoate  | 0              | 7 | 118 $\pm$ 7.7  | 7  |
| mineral oil      | 0              | 7 | 6.33 $\pm$ 1.7 | 6  |
| acetophenone     | 0              | 6 | NA             | NA |
| butyl ITC        | 0              | 6 | NA             | NA |
| mandelonitrile   | 0              | 6 | NA             | NA |
| cis-3-hexenyl    | 0              | 6 | NA             | NA |
| butyrate         | 0              | 6 | NA             | NA |
| trans-2-pentenal | 0              | 6 | NA             | NA |
| geranyl acetate  | 0              | 6 | NA             | NA |
| mineral oil      | 0              | 7 | NA             | NA |

| Odors                            | Dmel67b        |   | Spal67b          |    | Sfla67b1        |    | Sfla67b2        |   | Sfla67b3       |    |
|----------------------------------|----------------|---|------------------|----|-----------------|----|-----------------|---|----------------|----|
|                                  | spikes         | n | spikes           | n  | spikes          | n  | spikes          | n | spikes         | n  |
| apple cider vinegar              | 96.3 $\pm$ 8.0 | 6 | 62 $\pm$ 10.4    | 7  | -4.33 $\pm$ 2.0 | 6  | 6.67 $\pm$ 4.6  | 6 | 15 $\pm$ 2.1   | 6  |
| arugula                          | 19.7 $\pm$ 3.0 | 6 | 14 $\pm$ 3.4     | 7  | 64 $\pm$ 7.8    | 6  | 24 $\pm$ 8.7    | 6 | 22.3 $\pm$ 2.3 | 6  |
| wasabi                           | 2.67 $\pm$ 2.0 | 6 | 2.67 $\pm$ 1.11  | 6  | 15.3 $\pm$ 1.9  | 8  | 16.2 $\pm$ 2.5  | 8 | 13.7 $\pm$ 4.4 | 6  |
| horseradish                      | 3.67 $\pm$ 1.8 | 6 | -0.33 $\pm$ 1.0  | 6  | 8.75 $\pm$ 1.3  | 8  | 12.9 $\pm$ 2.0  | 8 | 31.7 $\pm$ 4.4 | 6  |
| turnip                           | 1 $\pm$ 1.8    | 6 | 0.67 $\pm$ 0.7   | 6  | 11.8 $\pm$ 1.6  | 8  | 22 $\pm$ 2.7    | 8 | 34.3 $\pm$ 1.4 | 6  |
| daikon                           | 2 $\pm$ 3.2    | 6 | -0.67 $\pm$ 0.8  | 6  | 14 $\pm$ 2.4    | 8  | 17.1 $\pm$ 3.4  | 8 | 19 $\pm$ 3.4   | 6  |
| beet                             | 8 $\pm$ 3.8    | 6 | -0.33 $\pm$ 1.1  | 6  | 2 $\pm$ 1.30    | 6  | -0.33 $\pm$ 1.7 | 6 | 4.33 $\pm$ 2.2 | 6  |
| <b>Dmel67b activators</b>        |                |   |                  |    |                 |    |                 |   |                |    |
| acetophenone                     | 176 $\pm$ 18   | 7 | 78 $\pm$ 2.4     | 20 | 3.27 $\pm$ 1.2  | 11 | 4.5 $\pm$ 2.0   | 8 | 1.57 $\pm$ 1.3 | 14 |
| cis-3-hexen-1-ol                 | 56.9 $\pm$ 20  | 7 | 22 $\pm$ 4.1     | 7  | 8.67 $\pm$ 2.0  | 6  | 6.75 $\pm$ 1.3  | 8 | 2.67 $\pm$ 2.3 | 6  |
| 4-methylcyclohexenol             | 80.7 $\pm$ 8.7 | 6 | 33 $\pm$ 4.4     | 13 | 8.89 $\pm$ 4.3  | 9  | 1.56 $\pm$ 1.4  | 9 | 2.67 $\pm$ 1.2 | 6  |
| phenethyl alcohol                | 140 $\pm$ 19   | 8 | 26.3 $\pm$ 4.5   | 6  | 2.67 $\pm$ 1.2  | 6  | 1 $\pm$ 1.2     | 6 | 3.67 $\pm$ 1.5 | 6  |
| 1-hexanol                        | 118 $\pm$ 13   | 7 | 19.14 $\pm$ 2857 | 7  | 13.7 $\pm$ 3.8  | 6  | 10.4 $\pm$ 4.6  | 9 | 8 $\pm$ 1.9    | 6  |
| ethyl (S)-(+)-3-hydroxybutanoate | 15.7 $\pm$ 3.3 | 7 | 12 $\pm$ 2.8     | 7  | 4.33 $\pm$ 4.4  | 6  | 10.4 $\pm$ 2.9  | 9 | 8 $\pm$ 2      | 6  |
| 2-hexanol                        | 12.3 $\pm$ 5.2 | 8 | 11.7 $\pm$ 2.8   | 7  | 7.33 $\pm$ 2.1  | 6  | 9.5 $\pm$ 1.8   | 8 | 7 $\pm$ 3.1    | 6  |
| benzyl alcohol                   | 48.6 $\pm$ 2.9 | 6 | 14.3 $\pm$ 3.7   | 7  | -1.33 $\pm$ 0.8 | 6  | 6.75 $\pm$ 1.8  | 8 | 5.67 $\pm$ 1.4 | 6  |

|                                            |               |   |           |   |           |    |           |   |          |    |
|--------------------------------------------|---------------|---|-----------|---|-----------|----|-----------|---|----------|----|
| 2-hexanone                                 | 40±16         | 7 | 7.14±2.0  | 7 | 9.33±4.8  | 6  | 7.5±2.0   | 8 | 7.33±3.5 | 6  |
| hexyl-formate                              | 39.3±8.7      | 6 | 16.3±5.6  | 7 | 7±2.0     | 6  | 8.89±4.5  | 9 | 3±0.9    | 6  |
| phenethyl aldehyde                         | 51.4±10       | 7 | 29.4±3.8  | 7 | 2±2.3     | 6  | 2.86±3.0  | 7 | 1±0.7    | 6  |
| 2-heptanone                                | 28±4.1        | 7 | 13.1±2.3  | 7 | 6.33±2.4  | 6  | 15.3±2.5  | 9 | 6±1.9    | 7  |
| <b>ITCs</b>                                |               |   |           |   |           |    |           |   |          |    |
| butyl ITC                                  | 4.57±1.6      | 7 | 15±4.2    | 6 | 196±15    | 7  | 22.7±2.8  | 6 | 171±11   | 7  |
| ethyl ITC                                  | 0.33±1.5      | 6 | 2.33±0.95 | 6 | 24±2.7    | 6  | 3.33±3.9  | 6 | 13±1.7   | 6  |
| isobutyl ITC                               | 1.67±2.4      | 6 | 5.33±2.6  | 6 | 74±12     | 7  | 4.33±1.8  | 6 | 139±17   | 7  |
| sec-butyl ITC                              | 4.29±1.0      | 7 | 5±1.8     | 6 | 9.14±2.7  | 7  | 5.33±2.3  | 6 | 121±17   | 8  |
| allyl ITC                                  | 3.43±0.8      | 7 | 9.75±4.2  | 8 | 28.9±5.3  | 7  | 6±2.4     | 7 | 4.75±3.7 | 8  |
| 3-methylthio propyl ITC                    | 2±1.8         | 6 | 6.33±2.2  | 6 | 179±9.2   | 6  | 33±6.0    | 6 | 137±17   | 8  |
| benzyl ITC                                 | 2.29±1.4      | 7 | 3.75±1.9  | 8 | 81.7±14.4 | 7  | 3.14±1.3  | 7 | 134±14   | 8  |
| phenethyl ITC                              | 6.57±2.2      | 7 | 5.25±2.8  | 8 | 4.8±1.3   | 10 | 1.14±0.86 | 7 | 158±15   | 8  |
| 3-methoxybenzyl ITC                        | -<br>0.67±1.1 | 6 | 7±3.3     | 6 | 4.57±2.2  | 7  | 1.67±0.80 | 6 | 3.14±2.1 | 7  |
| <b>Nitriles</b>                            |               |   |           |   |           |    |           |   |          |    |
| mandelonitrile                             | 45.3±11       | 6 | 1±1       | 6 | 1.33±1.8  | 6  | -0.29±0.7 | 7 | 4±3.0    | 6  |
| adiponitrile                               | 2.67±2.5      | 6 | 0.33±0.33 | 6 | 0.33±0.3  | 6  | 0.67±2.2  | 6 | 4.33±1.8 | 6  |
| propionitrile                              | 5.33±1.6      | 6 | 1.33±0.4  | 6 | 2.3±2.0   | 6  | 1.33±1.1  | 6 | 4.33±2.5 | 6  |
| <b>GLVs</b>                                |               |   |           |   |           |    |           |   |          |    |
| cis-3-hexenyl butyrate                     | 91±21         | 7 | 49.3±8.0  | 6 | 5±2.6     | 8  | 2±1.8     | 6 | 11.8±2.5 | 8  |
| trans-2-hexen-1-ol                         | 33±6.0        | 6 | 51±11     | 6 | 23.5±5.6  | 8  | 3±2.5     | 6 | 6.29±2.2 | 7  |
| trans-2-hexenyl acetate                    | 55.7±19       | 7 | 34±6.8    | 6 | 2±2.1     | 6  | 17.3±2.5  | 6 | 10.3±1.9 | 8  |
| trans-2-hexenyl butyrate                   | 29.7±6.7      | 6 | 35.6±8.2  | 6 | 1.71±1.0  | 7  | 4±1.5     | 6 | 12±4.3   | 7  |
| cis-3-hexenyl acetate                      | 43.3±9.3      | 6 | 13.7±2.6  | 6 | 1.67±1.7  | 6  | 16±5.3    | 8 | 11±5.8   | 6  |
| <b>TrpA1 activators/<br/>electrophiles</b> |               |   |           |   |           |    |           |   |          |    |
| trans-2-pentenal                           | 27.1±20       | 7 | 6.33±0.8  | 6 | 4.33±2.9  | 6  | 4±1.4     | 6 | 4±1.3    | 6  |
| citronellal                                | 1.43±1.6      | 7 | 7±2.3     | 6 | 4.57±1.6  | 7  | 9.14±3.5  | 7 | 12±2.8   | 11 |
| cinnamaldehyde                             | 12.3±2.8      | 7 | 9±3.8     | 6 | 9.25±2.7  | 8  | 3±1       | 6 | 6±1.7    | 12 |

|                                    |          |    |           |    |          |   |           |   |          |    |
|------------------------------------|----------|----|-----------|----|----------|---|-----------|---|----------|----|
| acorelin                           | 2.67±2.6 | 6  | 6.33±2.2  | 6  | 6.67±1.9 | 6 | 7±4.3     | 6 | 3.33±1.3 | 6  |
| iodoacetamide                      | 1.43±1.4 | 7  | 6±1.9     | 6  | 7.33±1.6 | 6 | 6±2.4     | 6 | 4±1.7    | 6  |
| formaldehyde                       | 3.14±2.0 | 7  | 5.33±1.8  | 6  | 6±2.9    | 6 | 3±1.4     | 6 | 2±1.0    | 6  |
| N-methylmaleimide                  | 3.71±1.0 | 7  | 8.67±2.6  | 6  | 7.33±1.8 | 6 | 10±1.9    | 6 | 3±1.3    | 6  |
| N-hydroxysuccinimide               | 1.71±1.3 | 7  | 4.67±2.5  | 6  | 4.67±2.6 | 6 | 8.67±2.3  | 6 | 2±0.7    | 6  |
| methyl salicylate                  | -3±1.8   | 7  | 0±0.5     | 6  | 3±3      | 6 | -0.57±1.8 | 7 | 5.33±4.2 | 6  |
| S-allyl 2-propene-1-sulfinothioate | 5.66±1.0 | 7  | -0.33±0.8 | 6  | 3.67±1.5 | 6 | 0.57±1.1  | 7 | 3±1.5    | 6  |
| diallyl disulfide                  | 3.33±3.3 | 7  | 0.67±0.8  | 6  | 1.33±0.7 | 6 | 1.14±0.6  | 7 | 3.67±2.1 | 6  |
| <b>Others</b>                      |          |    |           |    |          |   |           |   |          |    |
| geranyl acetate                    | 5.67±1.0 | 6  | 26±6.5    | 6  | 8.5±2.4  | 8 | 4.67±2.0  | 6 | 5.25±1.4 | 8  |
| limonene                           | 2.29±2.4 | 7  | 5±4.1     | 6  | 4.33±1.6 | 6 | 1±0.7     | 6 | 2.71±1.5 | 14 |
| indol-3-carbinol                   | 4±1.5    | 6  | 3.33±2.6  | 6  | 5.67±1.6 | 6 | 8.67±1.1  | 6 | 3.33±0.8 | 6  |
| benzyl thiocyanate                 | 2.57±1.4 | 7  | 7.67±1.4  | 6  | 8.67±2.4 | 6 | 5±1.3     | 6 | 8.67±2.8 | 6  |
| <b>Solvent control</b>             |          |    |           |    |          |   |           |   |          |    |
| DMSO                               | 2.86±1.6 | 7  | 10.7±3.2  | 6  | 3.33±1.0 | 6 | 7.67±1.4  | 6 | 4.33±2.9 | 6  |
| mineral oil                        | 3.73±1.2 | 15 | 0.91±0.87 | 11 | 1±1.4    | 6 | 1±1.8     | 6 | 0±0.38   | 11 |

|                                | <b>Sfla67b1</b> |          | <b>Sfla67b3</b> |          |
|--------------------------------|-----------------|----------|-----------------|----------|
| <b>odorants</b>                | <b>spikes</b>   | <b>n</b> | <b>spikes</b>   | <b>n</b> |
| <b>3-methylthio propyl ITC</b> |                 |          |                 |          |
| 1/100                          | 114±18          | 8        | 127±13          | 6        |
| 1/1,000                        | 64±11           | 8        | 27.7±7.1        | 6        |
| 1/10,000                       | 27.9±4.6        | 8        | 11.7±5.3        | 6        |
| 1/100,000                      | 12±3.3          | 9        | 10±4.0          | 6        |
| <b>butyl ITC</b>               |                 |          |                 |          |
| 1/100                          | 147±19          | 10       | 161±16          | 6        |
| 1/1,000                        | 46.8±6.6        | 9        | 50.7±8.1        | 6        |
| 1/10,000                       | 25.6±7.3        | 8        | 19.7±6.2        | 6        |
| 1/100,000                      | 14.25±5         | 9        | 7.33±3.4        | 6        |
| <b>isobutyl ITC</b>            |                 |          |                 |          |



|                      |           |    |          |    |
|----------------------|-----------|----|----------|----|
| 1/100                | 40.6±9.0  | 8  | 131±14   | 6  |
| 1/1,000              | 6.3±2.3   | 8  | 31.7±5.6 | 6  |
| 1/10,000             | 5.63±2.7  | 8  | 9±3.8    | 6  |
| 1/100,000            | 8.25±1.8  | 9  | 6±5.2    | 6  |
| <b>sec-butyl ITC</b> |           |    |          |    |
| 1/100                | 5±1.7     | 9  | 124±13   | 6  |
| 1/1,000              | 4.5±1.6   | 9  | 26.3±4.2 | 6  |
| 1/10,000             | 5.63±1.8  | 8  | 13.7±4.6 | 6  |
| 1/100,000            | 10.5±3.5  | 8  | 9±4.5    | 6  |
| <b>benzyl ITC</b>    |           |    |          |    |
| 1/100                | 94.5±14.1 | 10 | 123±13   | 6  |
| 1/1,000              | 16.5±5.1  | 9  | 27.7±9.4 | 6  |
| 1/10,000             | 8.625±3.6 | 8  | 8±1.4    | 6  |
| 1/100,000            | 10.5±3.2  | 9  | 13±5.0   | 6  |
| <b>phenethyl ITC</b> |           |    |          |    |
| 1/100                | 5.25±2.8  | 9  | 147±17   | 6  |
| 1/1,000              | 8.5±3.0   | 8  | 74±18    | 6  |
| 1/10,000             | 8.71±4.1  | 7  | 26.3±7.4 | 6  |
| 1/100,000            | 8±2.9     | 7  | 9.33±5.2 | 6  |
| <b>mineral oil</b>   | 1±1.4     | 6  | 0±0.4    | 11 |

**Tables S3:** Responses (net number of spikes/second; average ± SE) of the ab3 sensilla of flies expressing either no Or22a ("Empty neuron"), wild-type *Or22a* (Canton-S), *Dmel Or67b*, *Spal Or67b*, *Sfla Or67b1*, *Sfla Or67b2* or *Or67b3* to stimulation with the odors and number of recordings (n) are denoted.

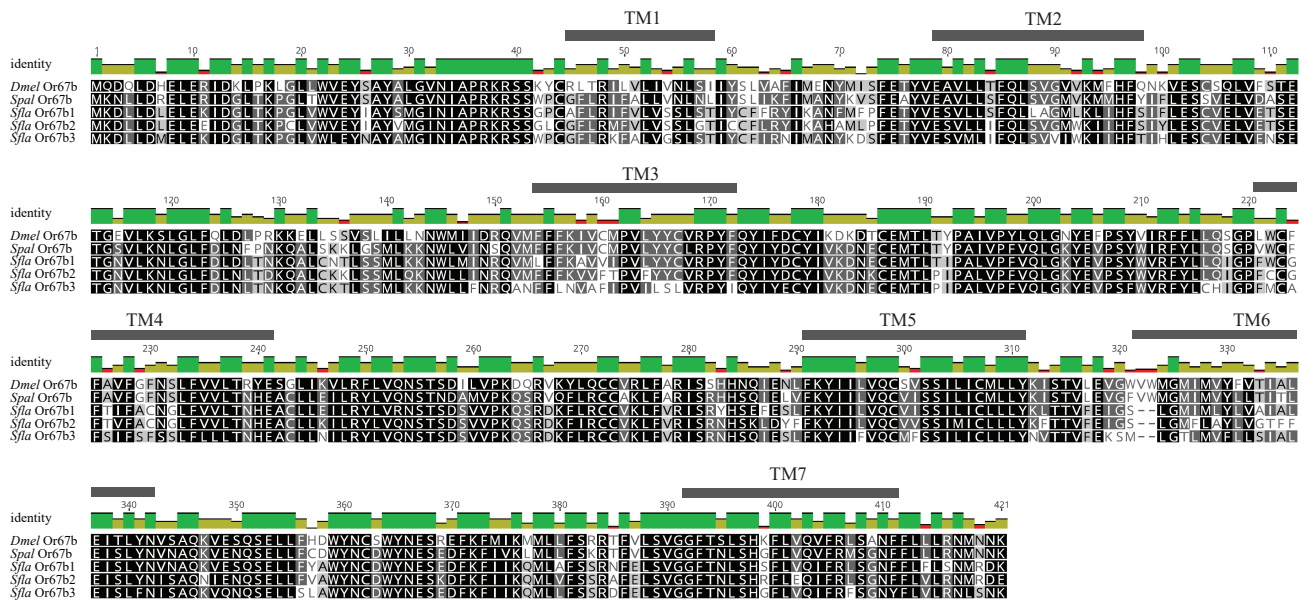

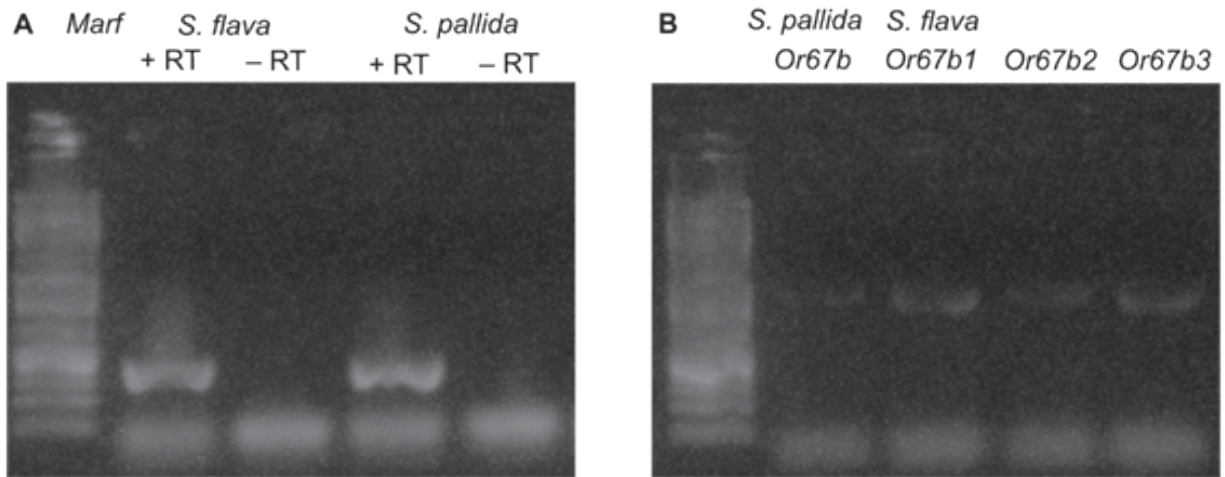

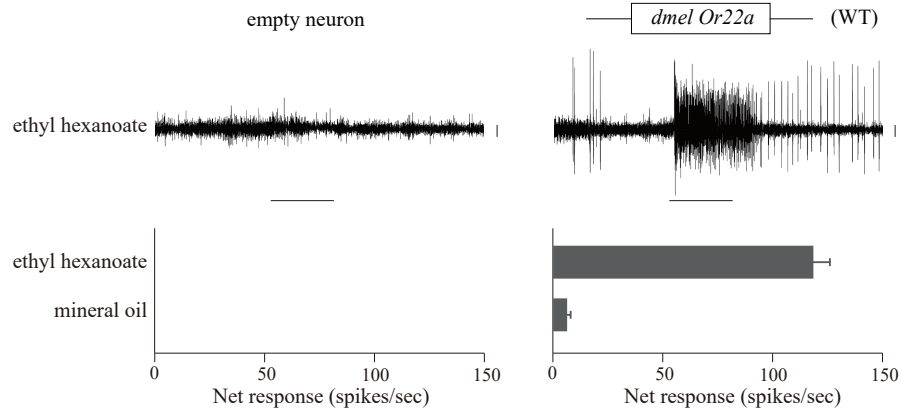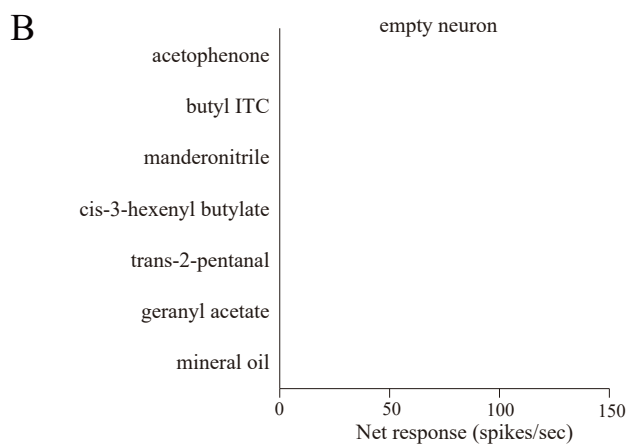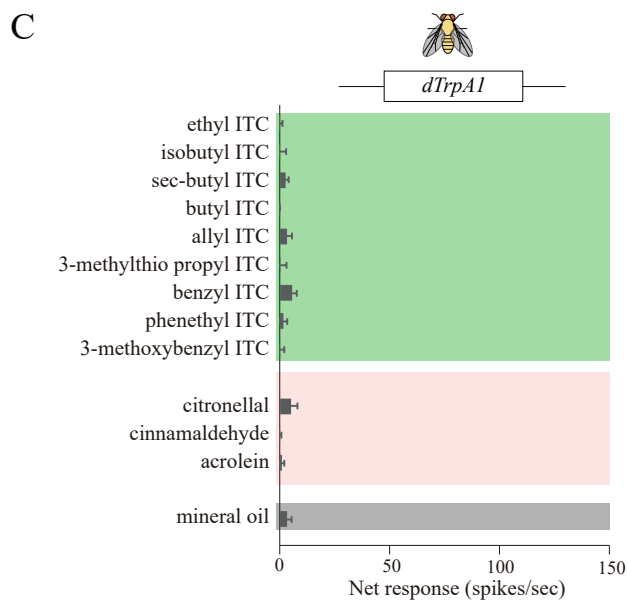

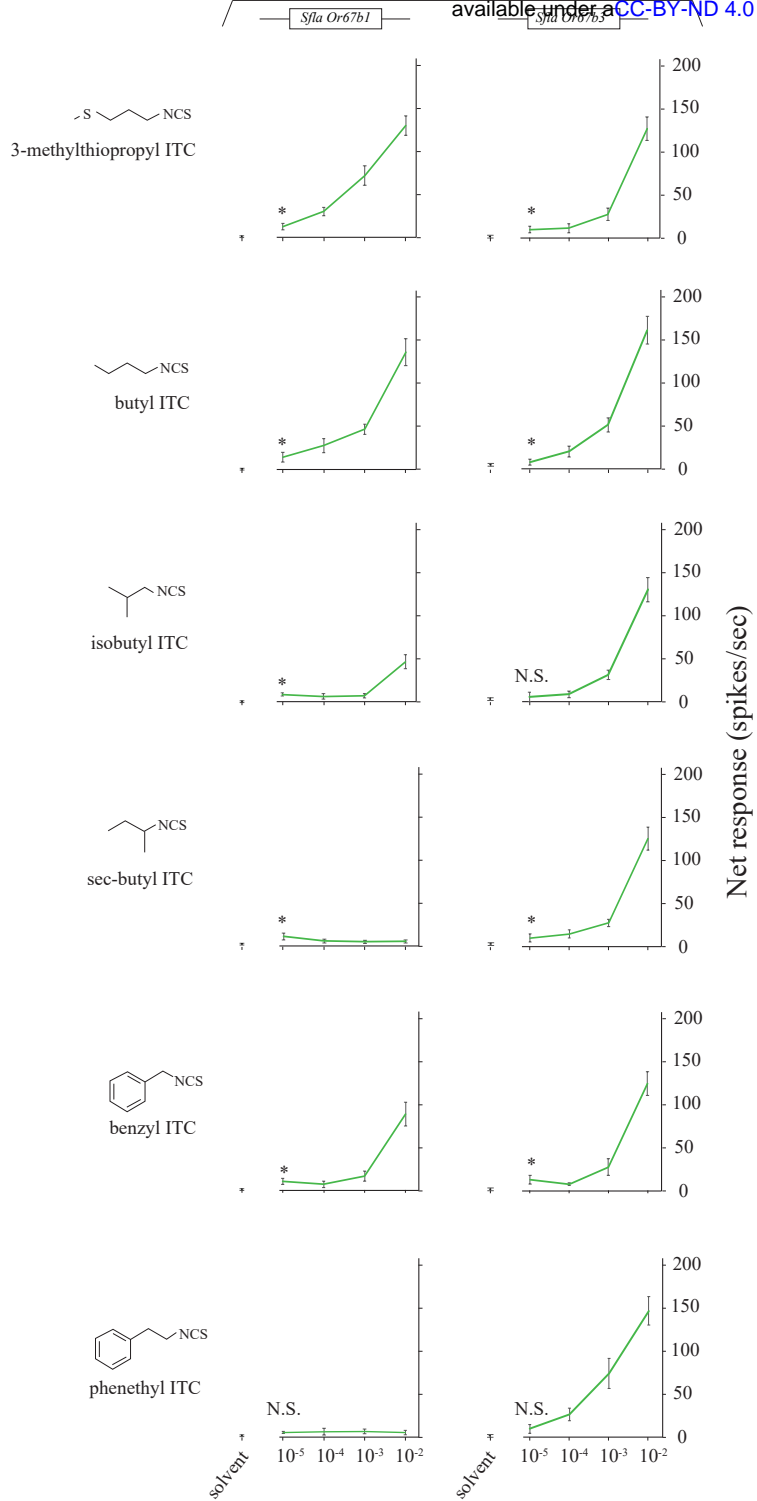

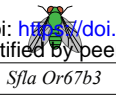

Sfla Or67b3

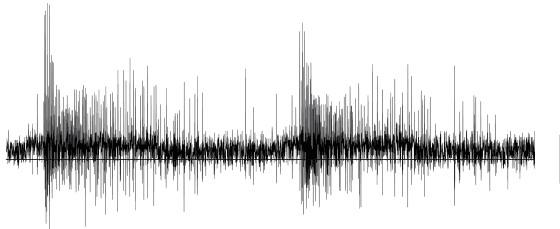

iso-butyl ITC

sec-butyl ITC

833 **Supplemental Figure Legends:**

834

835 **Supplemental Figure 1: Protein alignment of *D. melanogaster*, *S. pallida* and *S. flava***

836 **Or67bs.**

837 Note the high number of identical amino acids across orthologs/paralogs (black squares). Also  
838 shown are each of the seven predicted transmembrane domains (TM1-7). Darker colors illustrate  
839 higher degrees of sequence similarity, and lighter colors denote residues with high variability in  
840 sequence across paralogs and orthologs.

841

842 **Supplemental Figure 2: *Or67bs* are expressed in *Scaptomyza* spp.**

843 (A) Amplification of *Marf* from cDNA generated from whole body extracts of *S. flava* and *S.*  
844 *pallida* adults (+RT). As expected, *Marf* does not amplify in templates treated with DNaseI  
845 without reverse transcriptase (– RT). (B) Amplification of *Or67b* genes from *S. pallida* and *S.*  
846 *flava* whole adult cDNA, indicative of *in vivo* transcription of *Or67b* genes in adult *Scaptomyza*.  
847 Ladder is Gene Ruler™ 1 kb plus (ThermoFisher, USA).

848

849 **Supplemental Figure 3:**

850 (A) Lack of *Or22a* expression in the ab3A neuron in the M2-MD fly line (“empty neuron”  
851 mutant) was verified by lack of electrophysiological responses to ethyl hexanoate (left). In  
852 contrast, in wild-type flies (Canton-S), ab3A neurons respond strongly to simulation with this  
853 odor compound (right). Data indicates the net number of spikes/sec (average ± SE, n= 6-7 for

854 each odor and control stimulation, obtained from 3 females). (B) Single odorants used for  
855 statistical analysis in Fig. 3 were tested on the mutant ab3A neuron lacking its endogenous  
856 olfactory receptor. Stimulation with any of the odorants failed to evoke spiking activity. (C)  
857 *dTrpA1* was expressed in the ab3A neuron in the M2-MD fly line. None of the volatile ITCs or  
858 electrophiles elicited spiking activity. For a list of chemical categories see Fig. 3.

859

#### 860 **Supplemental Figure 4: Odorant dose-responses of *Sfla Or67b1* and *Sfla Or67b3***

861 Responses (net spikes/sec, average +/- SE, n=6, obtained from 2 animals) of *Sfla Or67b1* and  
862 *Sfla Or67b3* to stimulation with increasing concentrations (vol/vol) of six different ITCs. The  
863 responses of *Sfla Or67b3* steadily increased with increasing the concentration of all ITCs tested.  
864 *Sfla Or67b1* and *Sfla Or67b3* showed similar dose-response relationships in response to  
865 stimulation with 3-methyl-thio-propyl-ITC, butyl ITC, and benzyl ITC. Stimulation with sec-  
866 butyl ITC and phenethyl ITC produced only a very slight increase in spike activity (<10  
867 spikes/second) from *Sfla Or67b1* at any of the concentrations tested. The asterisks indicate  
868 significant differences between the responses to the 1:10,000 vol/vol concentration and the  
869 responses to the mineral oil control (Mann-Whitney U tests corrected for multiple testing using  
870 FDR; adjusted p-values: \* p<0.05).

871

#### 872 **Supplemental Figure 5: *Sfla Or67b3* has fast recovery.**

873 Representative electrophysiological recording obtained from the ab3 sensilla of flies expressing  
874 *Sfla Or67b3* in response to stimulation with iso-butyl ITC following sec-butyl ITC with one  
875 second interval between chemical administration. The horizontal bar denotes one second and the



876 vertical bar denotes 10 mV. *Sfla* Or67b3 sensitivity is recovered within seconds after stimulation  
877 with ITCs.

878

## 879 **Supplemental Material and Methods:**

### 880 **Fly husbandry and lines**

881 *D. melanogaster* (Canton-S) were reared using standard cornmeal media, yeast, and agar  
882 medium. Isofemale lines of *S. pallida* (collected in Berkeley, California, US) were maintained on  
883 Nutri-Fly medium (Genesee Scientific). *S. flava* (collected in New Hampshire, US) were  
884 maintained on fresh *Arabidopsis thaliana* and 10% honey water solution. All flies were cultured  
885 at 23°C and 60% relative humidity under a 12-h light/12-h dark cycle. *S. flava* and *S. pallida*  
886 were about 7-10 days old at the time of experiments; *D. melanogaster* (wild-type or transgenic)  
887 were about 3-10 days old at the time of the experiments.

888 M2-MD refers to a CRISPR/Cas9 deletion of *Or22a/b* and a knock-in of *Gal4* and *DsRed*  
889 by homologous repair. *Gal4* is not functional but *DsRed* is expressed in the eye. The functional  
890 absence of *Or22a* and *Or22b* genes in M2-MD flies was confirmed by electrophysiological  
891 analysis on *Or22a/b* expressing neurons in wild-type flies (Fig. S3). The M2-MD line was used  
892 to generate flies expressing *Dmel Or67b*, *Spal Or67b* and *Sfla Or67b1-3* under the control of  
893 *Gal4* in the ab3A “empty neuron”. The *UAS-SflaOr67b1*, *UAS-Sfla Or67b2*, *UAS-Sfla Or67b3*,  
894 and *UAS-Spal Or67b* strains were generated during this study.

895

896 ***Scaptomyza Or67b* gene cloning, UAS line generation, and verification of *S. flava Or67b***  
897 **transcription**

898 The *UAS-Or67b* transgene lines were constructed as follows: RNA was extracted from  
899 20–25 male and female, laboratory-reared, adult flies of *S. pallida* (collected from the White  
900 Mountains, New Mexico) and *S. flava* (collected from near Portsmouth, New Hampshire). RNA  
901 was extracted using Trizol (Thermo-Fisher, Waltham, MA) and precipitated with isopropanol.  
902 Extracted RNA was treated with DNaseI; cDNA was then generated using qScript cDNA  
903 Supermix (Quantabio, Beverly, MA). Absence of gDNA in cDNA preparations was verified by  
904 attempting to amplify fragments of the *Marf* gene from reactions lacking reverse transcriptase  
905 (Fig. S2; PCR conditions and primers detailed in (59)). CDS plus 7–9 bp of untranslated  
906 sequence were amplified using High Fidelity Phusion Taq (New England BioLabs, NEB), 3%  
907 DMSO v/v, and the PCR primers (Table S2) with the following program: initial denaturing at  
908 98°C during 30 sec; 35 cycles at 98°C for 10 sec, 58°C for 30 sec, 72°C for 45 sec, and  
909 extension at 72°C during 7 min. PCR fragments of the expected size were purified using  
910 Qiaquick Gel purification kit protocol (Qiagen). An overhang was added to purified *Or67b*  
911 amplicons with Taq polymerase (Fermentas) and cloned using the pGEM-T Easy cloning kit  
912 protocol (Promega). Plasmids were extracted and purified using the GenElute plasmid miniprep  
913 kit (Sigma-Aldrich, St. Louis, MO). EcoRI and KpnI cut sites were introduced using restriction  
914 enzyme cut-site primers (Table S2) with 10 ng/μL diluted plasmids (as template) with 3%  
915 DMSO vol/vol and the following program: initial denaturing at 98°C for 30 sec; 35 repetitions of  
916 98°C for 10 sec, 55°C for 50 sec; 72°C for 45 sec; and final extension at 72°C for 7 min. The  
917 pUAST attB plasmid (60) and the four *S. pallida* and *S. flava Or67b* PCR amplicons with RE  
918 flanking sites were individually double-digested with KpnI and EcoRI high-fidelity enzyme in

919 cut smart buffer for 3 hours, according to the manufacturer's protocol (NEB). Cut fragments  
920 were gel-purified using the Qiaquick Gel Cleanup Kit (Qiagen) and ligated in a 1:3 vector:insert  
921 molar ratio using T4 ligase (Promega). Ligations were transformed into JM109 cells. Some cells  
922 were preserved as glycerol stocks and a portion were sent for injection into the  $y^1 w^{67c23}$ ;  
923 P{CaryP}attP2 fly line (BestGene Inc., Houston, Texas, USA). Transformants were selected  
924 from individually injected flies with eye color rescue phenotypes. The four *UAS-Or67b* lines  
925 created in this study, the *UAS-Dmel Or67b* line, and the *UAS-dTrpA1* (stock no. 26264) line was  
926 each crossed into the M2-MD line. The progeny were then used for SSR recordings and  
927 behavioral experiments.

928

### 929 **Behavioral tests of olfactory attraction**

930 The olfactory responses of mated, non-starved *D. melanogaster* (Canton-S or transgenic),  
931 *S. pallida*, and *S. flava* were tested using a dual-choice "Y-shaped" olfactometer based on one  
932 previously published (20). The "Y piece" of the olfactometer was a propylene connector (43 mm  
933 long x 60 mm); the open ends of the arms of the "Y" were each connected to a 1-ml syringe  
934 containing a piece of filter paper (600 x 50 mm) loaded with the odor or control stimuli.  
935 Charcoal-filtered air was delivered to each of the two syringes using silicon tubing at 250  
936 ml/min; thus, at the base of the maze air flow was approximately 500 ml/min. Two hours (in the  
937 case of *D. melanogaster* and *S. pallida*) or 20 hours before tests (in the case of *S. flava*) insects  
938 were gently anesthetized under CO<sub>2</sub> and placed in groups of four in open-top and mesh-bottom  
939 cylindrical release containers (20 mm long x 10 mm diameter) constructed using silicon tube.  
940 The open top of the containers was capped with a piece of cotton soaked in distilled water (in the  
941 case of *D. melanogaster* and *S. pallida*) or with a piece of cotton soaked in 10% vol/vol aqueous

942 honey solution (in the case of *S. flava*). Before tests, each release tube was placed in ice during  
943 45-60 seconds to slow down insect activity, the cotton cap was removed, and the open-top of the  
944 tube was carefully slid into the open end of the Y maze. Thus, upon being released, insects could  
945 walk upwind towards the “decision point” (intersection of the short and long arms of the “Y”)  
946 and turn towards either the odor-laden or the odorless arm of the maze. Although four insects  
947 were released at once (to increase experimental efficacy), only the first choice (and the time of  
948 the choice) was recorded; a choice was considered as such only if the insect walked past at least  
949 10 mm into one of the arms, orienting upwind. The test was discarded if two or more insects  
950 choose the two arms of the maze within a 3-second window of each other. Each test lasted a  
951 maximum of five minutes, and each group of insects was used only once. As much as possible,  
952 insects from the same cohort were tested in the same day with different odors/odorants; insects  
953 from the three different species were also, as much as possible, tested in the same day with a  
954 given odor/odorant/different fly genotypes. Tests with each species/stimulus were conducted in  
955 at least five different days to compensate for possible day-to-day variations. Results from an  
956 individual test session with a given odor/odorant were discarded if insects did not make a choice  
957 is more than 50% of tests (this happened in less than 5% of experimental sessions). The position  
958 of the odor and odorless arms was switched every 1-2 tests to control for positional asymmetries;  
959 the mazes and odor sources were changed and replaced for clean/new ones every four tests or 10  
960 minutes, whichever comes first.

961         The odor/odorant was loaded in a piece of filter paper and inserted into the 1-ml syringe  
962 right before tests; control syringes had a piece of filter paper (3 x 40 mm) loaded with the  
963 mineral oil solvent (for odorant solutions) or water (for odor mixtures). Experimental and control  
964 filter papers were replaced by fresh ones every 4 tests or 10 minutes, whichever came first. The

965 odorants (20  $\mu$ l of 1:100 vol/vol mineral oil solution) used in experiments were butyl ITC  
966 (Sigma-Aldrich, CAS # 592-82-5, USA) and sec-butyl ITC (Sigma-Aldrich, CAS # 15585-98-5,  
967 USA). For tests with transgenic flies, responses were tested at 1:100 vol/vol and 1:1,000 vol/vol  
968 of butyl ITC. We also used apple cider vinegar (40  $\mu$ l, O Organics, USA; 40  $\mu$ l of distilled water  
969 was as control stimulus in these tests). For tests of host-orientation, two-four leaves from young  
970 arugula plants grown in an insect and insecticide/pesticide free chamber or greenhouse were  
971 excised just before tests, and placed in 5-ml syringes connected to the Y-maze; control syringes  
972 had two pieces of tissue paper. In all cases the Y-mazes, tubing and syringes were cleaned with  
973 70% ethanol and allowed to air-dry before reusing. Experiments were conducted during the 2<sup>nd</sup>-  
974 5<sup>th</sup> hour of the insects' photophase at 24 °C under white light (Feit electric, 100 Watts; in the case  
975 of *S. pallida* and *D. melanogaster*) or green light (Sunlite green, 100 Watts; in the case of  
976 experiments with *S. flava*). A total of 1,061 (669 with wild-type flies of *D. melanogaster*, *S.*  
977 *pallida* and *S. flava*; 392 with transgenic *D. melanogaster*) tests were and insects made a choice  
978 in 84% (888) of tests.

979 For each odor/odorant, species, sex and genotype, the number of tests with the first insect  
980 orienting towards the odorous arm and the odorless arm of the Y-maze were tested against a 50%  
981 expected random distribution using two-tailed Binomial tests (48). P-values were adjusted for  
982 multiple comparisons using the false discovery rate (FDR) method of Benjamini-Hochberg (49);  
983 results were considered significant if the Benjamini-Hochberg adjusted p-value was <0.05. For  
984 all tests, we verified that the power was >0.8.

985

986 **Molecular phylogeny of drosophilid Odorant Receptors (*Or*):**

987 Translations of *Ors* from *D. grimshawi*, *D. mojavensis*, *D. virilis* and *D. melanogaster* (builds  
988 dgri r1.3, dmoj r1.3, dvir r1.07 and dmel r6.28, respectively) were downloaded from Flybase  
989 ([www.flybase.org](http://www.flybase.org), (50)). *S. flava* sequences were previously published (19). Three hundred and  
990 nine sequences were aligned in MAFFT v7.017 with the E-INS-I algorithm and then manually  
991 adjusted (51). Models were fitted to the alignment using IQ-Tree and tested using the AIC  
992 criterion (52). A maximum likelihood (ML) phylogeny was generated using the Or protein  
993 alignment in RAxML v8.2.10 with the CAT model of rate heterogeneity with seven distinct  
994 categories, the JTT substitution matrix, empirical amino acid frequencies, and 1,000 rapid  
995 bootstraps (53). Orco sequences were designated as the outgroup.

996

997 **Molecular phylogeny of drosophilid *Or67b* genes:**

998 *Or67b* CDS from *D. grimshawi*, *D. mojavensis*, *D. virilis*, *D. sechellia*, *D. simulans*, *D. erecta*, *D.*  
999 *yakuba*, *D. pseudoobscura*, *D. persimilis*, *D. ananassae*, *D. willistoni* and *D. melanogaster*  
1000 (builds dgri r1.3, dmoj r1.3, dvir r1.07, dsec r1.3, dsim r1.4, dere r1.3, dyak r1.3, dpse r3.2, dper  
1001 r1.3, dana r1.3, dwil r1.3 and dmel r6.28, respectively) were downloaded from Flybase  
1002 ([www.flybase.org](http://www.flybase.org), (50)). The *S. pallida* DNA sequence was obtained through PCR as described  
1003 above; *S. flava* DNA sequences were previously published (19). Sequences were aligned, models  
1004 fitted and chosen according to AIC (GTR+I+G) in IQ-Tree (52). Trees were inferred using  
1005 RAxML (v8.2.10) with the GTRCATI model and 1000 rapid bootstraps, and MrBayes (v3.2.6)  
1006 setting Nst to 6, nucmodel to 4by4, rates to Invgamma, number of generations to 125,000, burnin  
1007 equal to 20% of generations, heating to 0.2, number of chains to 4, runs to 2 and priors set to  
1008 default setting (54).

1009 **Analysis of molecular evolution:**

1010 CDS of homologs of every *Or* gene in *S. flava* found in the 12 *Drosophila* genome builds were  
1011 aligned to *S. flava Or* CDS. Homology was assessed according to inclusion in well supported  
1012 clades in the *Or* translation phylogeny above; *S. flava* sequences were previously published (19).  
1013 Sequences were aligned in MAFFT (v7.017) (51) and adjusted manually to preserve codon  
1014 alignments. *Or98a*-like genes found in subgenus *Drosophila* species were split into three  
1015 separate clades, as were a group of *Or83c* paralogs not found in *D. melanogaster*, and a group of  
1016 *Or85a*-like genes. All sequences examined of *Or46a* contain two alternatively spliced exons, so  
1017 this gene was analyzed with all gene exon sequences in a single alignment as single taxa. *Or69a*,  
1018 however, contains alternatively spliced exons only among *Sophophora* species. These alternative  
1019 splice forms were analyzed as separate taxa. Phylogenies were generated for every alignment  
1020 using PhyML (55) with the GTR+G substitution models. If these trees showed >70% bootstrap  
1021 support for a topology contrary to the known species topology, or if the *Or* homology group  
1022 contained duplicates, these trees were used in PAML analyses instead of the species tree. Branch  
1023 models of sequence evolution were fit using PAML 4.9h (26). A foreground/background branch  
1024 model was fit for every *S. flava* tip branch and every ancestral branch in a *Scaptomyza*-specific  
1025 *Or* gene duplication clade, and compared in a likelihood ratio test to a null model with one dN/dS  
1026 rate for every unique phylogeny (75 tests total). After focusing on *Or67b*, patterns of molecular  
1027 evolution among the drosophilid *Or67b* homologs were explored using the expanded *Or67b*  
1028 CDS phylogeny above. Foreground/background branch models were fit for every branch in the  
1029 *Or67b* phylogeny with identical likely ratio tests performed as above (29 tests total Fig. 2B;  
1030 Table S1). P-values were adjusted for multiple-testing using the FDR method (49).

1031 **Distance tree obtained from responses of ab3A neurons expressing *Or67b* transgenes**

1032 A matrix of average response of five *Or67b* transgene receptors to 44 odorant compounds (1:100  
1033 vol/vol concentration) was produced (Table S3). Net responses were calculated by subtracting  
1034 the response to mineral oil or dimethyl sulfoxide solvent from the odor-evoked responses. A  
1035 Euclidean distance matrix was generated using the `dist` function of the R stats package(56).  
1036 Receptor responses were clustered by using the neighbor joining (NJ) algorithm on this distance  
1037 matrix. Support for clusters was assessed using 1000 bootstraps of the original response matrix  
1038 by generating distance matrices and NJ trees on the pseudo-datasets in `ape` (v5.3) (57).

1039

1040 **Single sensillum recordings (SSR)**

1041 Female fed flies were prepared for SSR as previously described (58). We identified sensilla of  
1042 targeted olfactory receptor cells using an Olympus BX51WI upright microscope with 10x and  
1043 50x objectives (Olympus, UPlanFL N 10x, UPlanFL N 50x). Extracellular activity was recorded  
1044 by inserting a tungsten electrode into the base of the ab3 sensillum. Signals were amplified  
1045 10,000 x (A-M systems, Differential AC Amplifier model 1700), digitized using a 16-bit analog-  
1046 digital converter, filtered (low cut-off: 300 Hz, high cut off: 3k Hz), and analyzed off-line with  
1047 WinEDR (v3.9.1; University of Strathclyde, Glasgow). A tube delivering a constant flow of  
1048 charcoal-filtered air was placed near the fly's head, and the tip of the stimulation pipette (50 ml)  
1049 was inserted into the constant air stream. The stimulation pipette contained a piece of filter paper  
1050 loaded with 20  $\mu$ l of odorant solution or the solvent control. One second pulse of clean air was  
1051 delivered to the stimulus pipette using a Stimulus Controller CS 55 (Syntech, Germany). We  
1052 used three standard odors for identification of ab3 sensilla (all from Sigma-Aldrich, US, purity >  
1053 1%): ethyl hexanoate (CAS # 123-66-0), ethyl acetate (CAS # 141-78-6) and 2-heptanone (CAS



1054 # 110-43-0). The following odor sources (all purchased in Berkeley, California, USA unless  
1055 otherwise mentioned; 20  $\mu$ l of material loaded on filter paper) were used: apple cider vinegar (40  
1056  $\mu$ l, O Organics, USA), grated roots of *Wasabia japonica* (wasabi), organic roots of *Armoracia*  
1057 *rusticana* (horseradish), *Brassica rapa* (turnip), *Raphanus sativus* (daikon), and *Beta vulgaris*  
1058 (beet). *Eruca vesicaria* (arugula) was grown from seeds at 23°C and 60% relative humidity in a  
1059 12-hours light: 12-hours dark cycle, and leaves from 3-8 weeks old plants were used for odor  
1060 stimulation. Roots and leaves were grated and homogenized using a vegetable grater to a volume  
1061 equivalent to ~500  $\mu$ l. The following odorants (all from Sigma-Aldrich, US) were diluted 1:100  
1062 vol/vol in dimethyl sulfoxide: iodoacetamide (CAS # 144-48-9), N-methylmaleimide (CAS #  
1063 930-88-1), N-hydroxysuccinimide (CAS # 6066-82-6), and 3-indol-carbinole (CAS # 700-06-1)  
1064 and benzyl thiocyanate (CAS # 3012-37-1). All the other chemicals were diluted in mineral oil at  
1065 1:100, 1:1,000, and 10,000 vol/vol. The “net number of spikes” were obtained by counting the  
1066 number of spikes during a 1-second window 0.2 seconds after the onset of stimulation, and  
1067 subtracting from this number the background spiking activity (obtained by counting the number  
1068 of spikes in a 1-second window prior to the onset of the odor stimulation). Data was analyzed  
1069 using Mann-Whitney Rank sum tests (for comparisons involving two means) and p-values were  
1070 adjusted for multiple comparisons using the FDR method, or by Kruskal-Wallis ANOVAs  
1071 followed by Dunn’s tests (for comparisons involving more than two means).

1072

1073 **Principal Component Analysis (PCA).** For visualization, Principal component analysis (PCA)  
1074 was done using Python.

1075

1076 **Data Analysis and figure generation:**

1077 All images and drawings are originals prepared by the authors. Figures were prepared via a  
1078 combination of WinEDR (v3.9.1), R Studio (v1.2.1335), Microsoft Excel (2016), Adobe  
1079 Illustrator (2019), Python, and Geneious (10.0.9).
